# Supplementary material for: A Linkage-Based Genome Assembly for the Mosquito Aedes albopictus and Identification of Chromosomal Regions Affecting Diapause
Source: Insects. 2021 Feb 16;12(2):167. doi: 10.3390/insects12020167 (PMC7919801; doi:10.3390/insects12020167)
Supplement: Supplementary file 1 [file insects-12-00167-s001.pdf]

## SUPPLEMENTARY INFORMATION FOR:

A linkage-based genome assembly for the mosquito *Aedes albopictus* and identification of chromosomal regions affecting diapause.

John H. Boyle, Pasi M.A. Rastas, Xin Huang, Austin G. Garner, Indra Vythilingam, Peter A. Armbruster

### ***File S1.1: Intercrossing tropical and temperate lines for linkage mapping and BSA***

The intercross lines used for the linkage mapping and BSA were established by mating an individual TROP male and an individual TEMP female for each line. To perform the cross, larvae from laboratory F<sub>3</sub> TROP and F<sub>7</sub> TEMP colonies were reared under near-optimal conditions of larval nutrition, a 16L:8D photoperiod at 21°C, and approximately 80% relative humidity as described previously [24, 25]. Upon pupation, TROP males and TEMP females were placed into separate adult cages. Two days after eclosion, TEMP females were blood fed to repletion on a human host, briefly CO<sub>2</sub> anesthetized, and females with a visible blood bolus were retained.

Sixty mating cages were established with one TROP male and three TEMP females per cage. Each cage consisted of a 1.2-liter inverted bucket with mesh windows and a moist filter paper lining the bottom of the cage. Cages were provisioned with organic raisins (Newman's Own Organic, Aptos, CA.) as a sugar source. After four days to allow for mating, TROP males were snap frozen in liquid nitrogen and stored at -80°C and TEMP females were individually placed into fly vials (28.5×95mm, Genesee Scientific, San Diego, CA, USA) half-filled with deionized water and sealed with mesh and provisioned with an organic raisin. A strip of unbleached paper towel (Seventh Generation, Burlington, VT, USA) was

placed into each fly vial to provide a substrate for oviposition. Two females that oviposited > 20 eggs each were snap frozen in liquid nitrogen and stored at -80°C for subsequent RNAseq genotyping. The eggs (intercross F<sub>1</sub>) of these females were maintained and hatched out under the near-optimal conditions as described above to establish two independent intercross lines. Larvae were reared as described above and adults were allowed to random mate in a separate 9.5-liter mass-swarm cage for each line with at least 100 males and 100 females each generation. Both lines were used for the BSA in the intercross F<sub>4</sub> generation. Additionally, one line was arbitrarily chosen and maintained to the intercross F<sub>7</sub> generation to increase recombination among marker SNPs for linkage mapping.

***File S1.2: Linkage mapping: Tissue preparation, RNA extraction, and sequencing***

In the intercross F<sub>7</sub> generation, larvae were reared to adults as described above. 50 males and 50 females were collected one week after eclosion, snap frozen in liquid nitrogen and individually stored at -80°C. Total RNA was extracted from each of the two parents and 70 individual F<sub>7</sub> intercross mosquitoes using a modified TRI® Reagent (Sigma Aldrich, St. Louis, MO) RNA extraction protocol described in previous publications[17, 19]. Briefly, contaminant DNA was removed from each RNA sample using a Turbo-DNA free kit (Ambion, Austin, Texas). For each sample, RNA integrity and quantity were assessed using an Agilent Bioanalyzer® RNA Chip (Agilent Technologies, Santa Clara, CA, USA). Only samples with an RNA quantity of at least 400 ng and minor or no degradation were retained for library preparation. Samples of total RNA from the two intercross F<sub>0</sub> parents were used for library preparation and sequencing alongside those of other TROP and TEMP

individuals as described below (see SI Section 1.5: “*Bulk segregant analysis: RNA extraction and sequencing of bulks, TEMP, and TROP individuals*”). Samples of total RNA from the 70 individual F<sub>7</sub> offspring were used to create individual sequencing libraries using a modified protocol from the NEBNext® Ultra™ RNA Library Prep Kit and NEBNext Poly(A) mRNA Magnetic Isolation Module (New England Biolabs, Ipswich, Massachusetts). Poly-A mRNA was isolated using Oligo d(T) 25 beads, chemically fragmented for 5 minutes at 94°C, and then converted to cDNA using random primers and a two-step double strand synthesis reaction. Double-stranded cDNA was then purified using an Agencourt AMPure XP bead clean up (Beckman Coulter Genomics, Chaska, MN). 5′ overhangs were filled and blunt end double-stranded cDNA was 5′ phosphorylated and 3′ dA-tailed. Each of the 70 dA-tailed cDNA samples was size selected for ~400bp inserts using Agencourt AMPure XP beads. After size selection, each cDNA sample was individually barcoded with a unique 8-base index using the NEBNext Oligo Adaptor set (96 Singleplex) and PCR enriched in a thermocycler as follows; 1 denaturation step at 98°C for 30 sec, 12 cycles of 98°C for 10 sec and 65°C for 75 sec, and 1 extension step at 65°C for 5 min. Next, cDNA libraries were purified again using an Agencourt AMPure XP bead clean up. Library quality and concentrations were assessed on an Agilent Bioanalyzer® High Sensitivity Chip (Agilent Technologies, Santa Clara, CA, USA). Each library was normalized to 2nM, and 5 pools were made from equal volumes of 14 cDNA libraries for each pool. Libraries were combined into pools based on the composition of barcode sequences according to specifications from the NEBNext Oligo Adapter set (96 Singleplex). Each pool was paired-end sequenced on an individual flow-cell lane of Illumina HiSeq 4000 (read length = 150 bp) at the Institute for Genome Science (IGS), University of Maryland.

***File S1.3: Linkage mapping: read cleaning and alignment to the Palatini et al. (2020) assembly***

In order to remove contaminant and low-quality reads, all libraries were aligned to the UniVec database of potential DNA vector contaminants [49], as well as *Ae. albopictus* rRNA sequences (Genbank accession L22060.1) and *Ae. albopictus* mitochondrial tRNA sequences (tRNA features from GenBank accession AY072044.1). These potential contaminant sequences were indexed using bowtie2 version 2.2.6 [34]. Alignment of RNAseq reads was performed using bowtie2 version 2.2.6, and any aligned reads were discarded. Scripts for all bioinformatics and analyses are available in our dryad repository at: <https://datadryad.org/stash/dataset/doi:10.5061/dryad.mgqnk98z4>.

We then used Trimmomatic version 0.39 [50] to trim Illumina adaptor sequences from the reads. We used the dynamictrim tool from SolexaQA++ version 3.1.7.1 [51] to trim off the ends of reads once quality fell below 15 and to remove any read pairs in which either of the pair had a length less than 50 bp. We removed any unpaired reads from each library using custom scripts.

We indexed the Palatini *et al.* (2020) genome assembly (AalbF2), Genbank accession GCA\_006496715.1, using the STAR aligner version 2.7.1a [52]. We then performed alignment of sequencing reads from the two intercross F<sub>0</sub> parents and 70 individual F<sub>7</sub> intercross individuals to the AalbF2 assembly using a 2-step alignment process. First, an initial STAR alignment to identify splice junctions in the mRNA libraries, then a second STAR alignment using those splice junctions to inform the alignment. The resulting alignments for each library were further processed using Picard version 2.20.4 [53] to sort

alignments, add read groups, and remove duplicates. We indexed the reference genome using samtools 0.1.19 [27, 54], and created a sequence dictionary using Picard. We then used the SplitNCigarReads tool from the Genome Analysis Toolkit (GATK) version 4.1.2.0 [55] to split alignments of RNA reads at which a splice junction had been identified.

***File S1.4: Bulk segregant analysis (BSA): measuring diapause phenotypes***

An adult mass-swarm cage was established for each line under a short-day photoperiod; each cage contained approximately 100 females and 100 males. After 11 days under short-day conditions, females were blood fed to repletion as described in SI Section 1.1. Engorged females were then transferred into individual fly vials half-filled with water and provisioned with an organic raisin and unbleached paper towel (Genesee Scientific, San Diego, CA, USA) as described in SI Section 1.1 to stimulate oviposition. Vials were checked daily and individual females were snap frozen in liquid nitrogen and stored at -80°C after they had oviposited at least 20 eggs. Diapause incidence (DI) was measured for eggs collected from individual females maintained under unambiguous short-day photoperiod (SD; 8L:16D) as described previously [25, 56]. Briefly, paper towel strips with eggs were removed from fly vials containing individual females every Monday-Wednesday-Friday (M-W-F), maintained under SD conditions for ~ 48 hr, and then gently air-dried. Egg papers were then stored at approximately 80% relative humidity under SD for at least seven days. Eggs ranging from one to two weeks of age were then stimulated to hatch by submersion in ~75 ml water with ~ 1ml larval food. The number of hatched larvae was recorded and the egg papers were re-dried. This procedure was repeated 7 days later, after which the eggs were bleached [57] to reveal the number of embryonated but unhatched (i.e., diapause)

eggs. DI was calculated as  $DI = (\text{number of embryonated unhatched eggs}) / (\text{number of hatched eggs} + \text{number of embryonated unhatched eggs})$  [25, 56].

***File S1.5: Bulk segregant analysis: RNA extraction and sequencing of bulks, TEMP, and TROP individuals***

RNA was extracted and sequencing libraries were prepared as described in the manuscript text (see: “*Bulk segregant analysis: RNA extraction and sequencing of bulks, TEMP, and TROP individuals*”). Eleven libraries from the TEMP and TROP individual samples were pooled for paired-end sequencing on one flow-cell lane, and the remaining 9 TEMP and TROP libraries were pooled for paired-end sequencing on another flow-cell lane of an Illumina HiSeq 2000 sequencer (read length = 100 bp). The four bulk libraries were paired-end sequenced on two lanes of an Illumina HiSeq 4000 (read length = 150 bp), with each lane containing the high and low bulks from a single line.

***File S1.6: Bulk segregant analysis: SNP calling and filtering***

We used HaplotypeCaller to call variants within each individual (or each bulk, adjusting the sample ploidy as appropriate), then used GenomicsDBImport for each scaffold to combine the outputs from HaplotypeCaller from all individuals (and bulks). We then used GenotypeGVCFs to do joint genotyping on all individuals (and bulks) simultaneously. The large ploidy of the bulks caused genotyping to fail due to lack of memory in some regions of the genome, which were therefore excluded from joint genotyping. These regions represented approximately 50-60 Mb spread across 143 scaffolds. The genotype calls were then combined using GatherVcfs, and a set of high-

quality SNPs output by removing SNPs with quality by depth (QD) < 10, phred-scaled  $p$ -value of Fisher's Exact Test for strand bias (FS) > 60, root mean square of the mapping quality (MQ) < 35, mapping quality rank sum test (MQRS) < -12.5, read position rank sum test (RPRS) < -8, or strand odds ratio (SOR) > 3.

This set of SNPs was then used as the basis of bootstrap base recalibration using the GATK BaseRecalibrator tool. The alignments produced above were recalibrated using the ApplyBQSR tool, and these alignments used as the basis of a second round of SNP calling, following the protocol outlined above. After base recalibration, approximately 60-70 Mb spread across 148 scaffolds was excluded due to memory failures during joint genotyping. High-quality SNPs were filtered as described above. The AnalyzeCovariates tool showed that a second round of base recalibration based on these SNPs had little effect on the alignment, and so we retained the SNPs identified after a single round of base recalibration. These recalibrated, high-quality SNPs were further filtered to exclude multiallelic loci using the GATK SelectVariants tool. For libraries from single mosquitoes, genotypes with a genotype quality score of 5 or less were removed from the data set.

#### ***File S1.7: Bulk segregant analysis: identifying putative diapause-associated SNPs***

To calculate a diapause-associated  $p$ -value based on SNP frequency differences between the TEMP and TROP sample, we calculated the proportion of the reference allele in each sample as the average of its proportion in the TEMP sample and its proportion in the TROP sample. From this, we assigned all SNPs into five categories based on minor allele frequencies (MAF):  $MAF \leq 0.1$ ,  $0.1 < MAF \leq 0.2$ ,  $0.2 < MAF \leq 0.3$ ,  $0.3 < MAF \leq 0.4$ , and  $MAF > 0.4$ . These categories account for the fact that SNPs with higher MAF have a larger range of

possible allele frequencies differences between the two parent populations. We then calculated a diapause-associated  $p$ -value as the percentile of the distribution of absolute value of allele frequency difference ( $|AFD|$ ) for each SNP within each category.

We calculated diapause-associated  $p$ -values separately for each of the bulks. In most cases (87%), we had genotyped both of the two founding parents of the bulk line. The genotypes of the parents affect the likely degree of allele frequency differentiation in the bulks; e.g., SNPs for which the parents had two of each allele are more able to become strongly differentiated solely by chance than SNPs for which the parents have one reference allele and three alternate alleles. We therefore divided SNPs into three categories, depending on whether the parents collectively had 4 identical alleles, 2 copies of the reference and the alternate allele between them, or 1 copy of one allele and 3 of the other. Within each category, we determined the percentile of each of the SNPs on the distribution of  $|AFD|$ , and assigned a  $p$ -value by subtracting that percentile from 1 (so that extreme allele frequency differences would have a low  $p$ -value). In the case of ties in  $|AFD|$ , all tied SNPs were assigned the lowest possible percentile, and thus the highest (i.e., least-significant)  $p$ -value. For those SNPs where the genotypes of the two parents had 4 identical alleles, the allele frequency difference between the high and low bulks was almost always 0 (98% of SNPs). In the exceptional cases in which the two parents were genotyped as having 4 identical alleles, but the bulks had a non-zero allele frequency difference, we assumed that this had arisen due to an erroneous genotype in either the parents or the bulks; since we lacked confidence in the genotyping of these SNPs, we set the  $p$ -value for these SNPs at 1. For those SNPs for which both parents had not been genotyped, we calculated a  $p$ -value as described above for the comparison of the TEMP and TROP samples. The overall

diapause-associated  $p$ -value for each SNP was calculated by multiplying the  $p$ -values for the three allele frequency differences described above (i.e., TEMP vs. TROP, high-diapause vs. low-diapause bulks for both BSA lines).

We applied three false discovery thresholds to take into account testing of multiple SNPs. In the first, only those SNPs were included for which their  $p$ -value was less than  $0.05 / 46,736 = 1.1 \times 10^{-6}$ . We used 46,736 as the denominator in this calculation because that is the number of SNPs that meet the criteria that the three allele frequency differences (AFDs) had the same sign (i.e., TEMP vs. TROP, high-diapause vs. low-diapause bulks for both BSA lines). The other two  $p$ -value cutoffs were  $1/46,736 = 2.1 \times 10^{-5}$  and  $5/46,736 = 1.1 \times 10^{-4}$ . These SNP sets are likely to include approximately 0.05, 1 and 5 falsely-discovered SNPs, respectively, but since the three threshold categories included approximately 4, 77 and 260 SNPs, the likelihood an any particularly SNP being a false-positive is low

**Table S1: Averaged sequencing results for RNA libraries used in this study.**

| Libraries                      | Millions of total read pairs sequenced, average (range) | Filtered read pairs aligned to genome (range) | Filtered SNPs called <sup>1</sup> |
|--------------------------------|---------------------------------------------------------|-----------------------------------------------|-----------------------------------|
| 2 F <sub>0</sub> parents       | 23 (20-25)                                              | 8 (7-8)                                       | 111,328                           |
| 70 F <sub>7</sub> offspring    | 28 (20-60)                                              | 11 (5-19)                                     | 111,328                           |
| 11 F <sub>0</sub> TEMP females | 22 (17-27)                                              | 11 (7-14)                                     | 988,325                           |
| 9 F <sub>0</sub> TROP males    | 16 (11-21)                                              | 7 (4-11)                                      | 988,325                           |
| High bulk, line 1              | 206                                                     | 79                                            | 3,391,066                         |
| Low bulk, line 1               | 177                                                     | 70                                            | 3,391,066                         |
| High bulk, line 2              | 208                                                     | 101                                           | 3,410,627                         |
| Low bulk, line 2               | 181                                                     | 89                                            | 3,410,627                         |

<sup>1</sup> Only SNPs that were found in both F<sub>0</sub> parent and F<sub>7</sub> offspring, both TROP and TEMP populations, or in both bulks of a line, were included, which is why the same number of SNPs were found in each of those pairs.

**Table S2. Individual library sequencing results for RNA libraries used in this study.**

| Individual Library ID | Group                 | Read pairs (millions) | Filtered read pairs aligned to genome (millions) |
|-----------------------|-----------------------|-----------------------|--------------------------------------------------|
| F7001                 | Linkage: F7 offspring | 24.2                  | 9.9                                              |
| F7004                 | Linkage: F7 offspring | 27.3                  | 13.9                                             |
| F7005                 | Linkage: F7 offspring | 32.0                  | 16.1                                             |
| F7006                 | Linkage: F7 offspring | 26.5                  | 13.3                                             |
| F7007                 | Linkage: F7 offspring | 25.5                  | 11.2                                             |
| F7009                 | Linkage: F7 offspring | 27.1                  | 9.4                                              |
| F7010                 | Linkage: F7 offspring | 26.2                  | 10.2                                             |
| F7011                 | Linkage: F7 offspring | 30.7                  | 15.1                                             |
| F7012                 | Linkage: F7 offspring | 25.1                  | 12.3                                             |
| F7013                 | Linkage: F7 offspring | 25.1                  | 11.9                                             |
| F7015                 | Linkage: F7 offspring | 28.5                  | 14.4                                             |
| F7016                 | Linkage: F7 offspring | 29.2                  | 8.1                                              |
| F7018                 | Linkage: F7 offspring | 29.3                  | 12.7                                             |
| F7019                 | Linkage: F7 offspring | 30.1                  | 13.5                                             |
| F7020                 | Linkage: F7 offspring | 30.7                  | 12.7                                             |
| F7022                 | Linkage: F7 offspring | 27.0                  | 10.5                                             |
| F7023                 | Linkage: F7 offspring | 27.8                  | 12.3                                             |
| F7024                 | Linkage: F7 offspring | 26.4                  | 13.2                                             |
| F7025                 | Linkage: F7 offspring | 28.4                  | 14.0                                             |
| F7026                 | Linkage: F7 offspring | 27.7                  | 13.6                                             |
| F7027                 | Linkage: F7 offspring | 26.8                  | 11.7                                             |
| F7028                 | Linkage: F7 offspring | 27.3                  | 10.1                                             |
| F7029                 | Linkage: F7 offspring | 25.2                  | 10.7                                             |
| F7030                 | Linkage: F7 offspring | 26.0                  | 12.6                                             |
| F7032                 | Linkage: F7 offspring | 30.4                  | 11.9                                             |
| F7033                 | Linkage: F7 offspring | 30.8                  | 10.3                                             |
| F7034                 | Linkage: F7 offspring | 26.0                  | 12.9                                             |
| F7035                 | Linkage: F7 offspring | 27.3                  | 11.7                                             |
| F7036                 | Linkage: F7 offspring | 22.9                  | 10.8                                             |
| F7037                 | Linkage: F7 offspring | 28.8                  | 12.5                                             |
| F7038                 | Linkage: F7 offspring | 27.2                  | 7.5                                              |
| F7041                 | Linkage: F7 offspring | 24.9                  | 12.9                                             |
| F7042                 | Linkage: F7 offspring | 29.3                  | 12.9                                             |
| F7043                 | Linkage: F7 offspring | 26.8                  | 7.5                                              |
| F7044                 | Linkage: F7 offspring | 25.6                  | 13.0                                             |
| F7045                 | Linkage: F7 offspring | 28.7                  | 8.6                                              |
| F7046                 | Linkage: F7 offspring | 31.5                  | 5.1                                              |
| F7047                 | Linkage: F7 offspring | 28.5                  | 13.3                                             |
| F7048                 | Linkage: F7 offspring | 31.5                  | 12.7                                             |
| F7049                 | Linkage: F7 offspring | 30.2                  | 4.7                                              |
| F7051                 | Linkage: F7 offspring | 35.5                  | 13.5                                             |
| F7054                 | Linkage: F7 offspring | 35.4                  | 16.6                                             |
| F7055                 | Linkage: F7 offspring | 30.5                  | 13.1                                             |
| F7057                 | Linkage: F7 offspring | 22.2                  | 9.2                                              |
| F7058                 | Linkage: F7 offspring | 28.8                  | 10.8                                             |
| F7060                 | Linkage: F7 offspring | 24.1                  | 11.3                                             |
| F7064                 | Linkage: F7 offspring | 32.2                  | 8.2                                              |

|                    |                                |      |      |
|--------------------|--------------------------------|------|------|
| F7066              | Linkage: F7 offspring          | 23.6 | 12.2 |
| F7067              | Linkage: F7 offspring          | 20.8 | 10.6 |
| F7068              | Linkage: F7 offspring          | 26.0 | 13.3 |
| F7069              | Linkage: F7 offspring          | 26.3 | 12.7 |
| F7073              | Linkage: F7 offspring          | 26.6 | 8.1  |
| F7076              | Linkage: F7 offspring          | 27.5 | 13.6 |
| F7077              | Linkage: F7 offspring          | 28.6 | 14.8 |
| F7078              | Linkage: F7 offspring          | 23.4 | 8.2  |
| F7079              | Linkage: F7 offspring          | 26.2 | 12.3 |
| F7080 <sup>1</sup> | Linkage: F7 offspring          | 12.3 | 10.7 |
|                    |                                | 19.3 |      |
| F7083 <sup>1</sup> | Linkage: F7 offspring          | 12.6 | 10.7 |
|                    |                                | 19.3 |      |
| F7084 <sup>1</sup> | Linkage: F7 offspring          | 11.2 | 12.3 |
|                    |                                | 16.6 |      |
| F7086              | Linkage: F7 offspring          | 28.8 | 13.9 |
| F7087              | Linkage: F7 offspring          | 32.8 | 16.8 |
| F7093              | Linkage: F7 offspring          | 35.5 | 16.5 |
| F7094              | Linkage: F7 offspring          | 35.6 | 14.0 |
| F7096              | Linkage: F7 offspring          | 24.7 | 12.2 |
| F7097              | Linkage: F7 offspring          | 22.2 | 10.4 |
| F7098              | Linkage: F7 offspring          | 23.2 | 6.2  |
| F7102              | Linkage: F7 offspring          | 19.8 | 8.7  |
| F7103              | Linkage: F7 offspring          | 60.1 | 19.2 |
| F7106              | Linkage: F7 offspring          | 36.7 | 13.1 |
| F7108              | Linkage: F7 offspring          | 35.4 | 17.7 |
| BH2                | BSA: high bulk, line 1         | 206  | 79   |
| BL2                | BSA: low bulk, line 1          | 177  | 70   |
| BH3                | BSA: high bulk, line 2         | 208  | 101  |
| BL3                | BSA: low bulk, line 2          | 181  | 89   |
| M01                | BSA: temperate population      | 17.3 | 9.3  |
| M02                | BSA: temperate population      | 17.2 | 9.1  |
| M03                | BSA: temperate population      | 18.5 | 6.9  |
| M04                | BSA: temperate population      | 19.3 | 10.0 |
| M05                | BSA: temperate population      | 22.6 | 10.8 |
| M06 <sup>2</sup>   | BSA: temperate population      | 20.4 | 10.7 |
| M07 <sup>3</sup>   | Linkage: F <sub>0</sub> parent | 25.3 | 8.4  |
|                    | BSA: temperate population      |      | 11.3 |
| M08                | BSA: temperate population      | 27.1 | 12.9 |
| M09                | BSA: temperate population      | 24.2 | 12.7 |
| M10                | BSA: temperate population      | 27.3 | 9.0  |
| M16                | BSA: temperate population      | 27.1 | 13.8 |
| K01                | BSA: tropical population       | 13.4 | 7.1  |
| K02                | BSA: tropical population       | 15.3 | 7.0  |
| K03                | BSA: tropical population       | 11.1 | 5.1  |
| K04                | BSA: tropical population       | 16.9 | 8.2  |
| K05 <sup>2</sup>   | BSA: tropical population       | 21.1 | 10.9 |
| K06 <sup>3</sup>   | Linkage: F <sub>0</sub> parent | 19.7 | 6.9  |
|                    | BSA: tropical population       |      | 9.0  |
| K07                | BSA: tropical population       | 13.3 | 4.0  |
| K08                | BSA: tropical population       | 10.6 | 3.5  |
| K16                | BSA: tropical population       | 20.9 | 9.5  |

<sup>1</sup> These libraries were sequenced on two different flowcells and later combined.

<sup>2</sup> These individuals were the founding parents of the line that produced bulk line 1.

<sup>3</sup> These individuals were the founding parents of the line that produced bulk line 2 and the individuals used for linkage mapping.

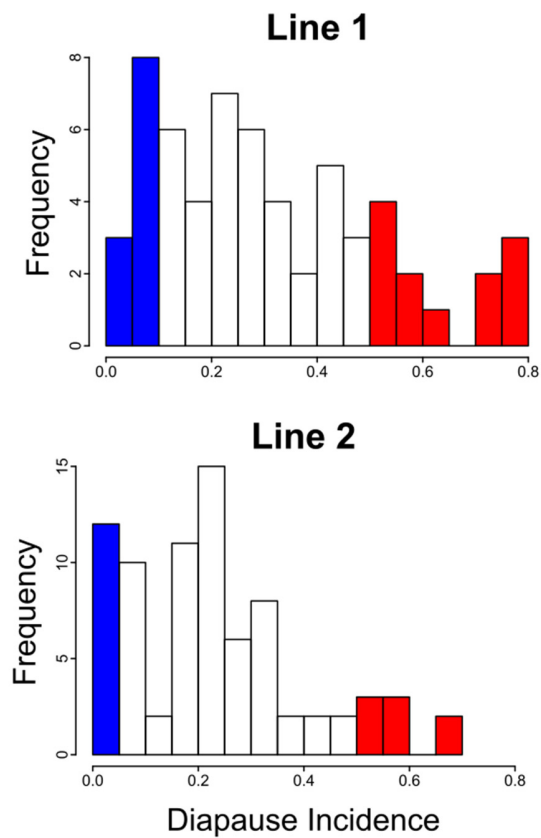

**Figure S1: Diapause incidence of intercross F<sub>4</sub> females in two independent bulk-segregant lines.** Blue bars show females chosen for low-diapause bulks within each line; red bars show females chosen for high-diapause bulks.

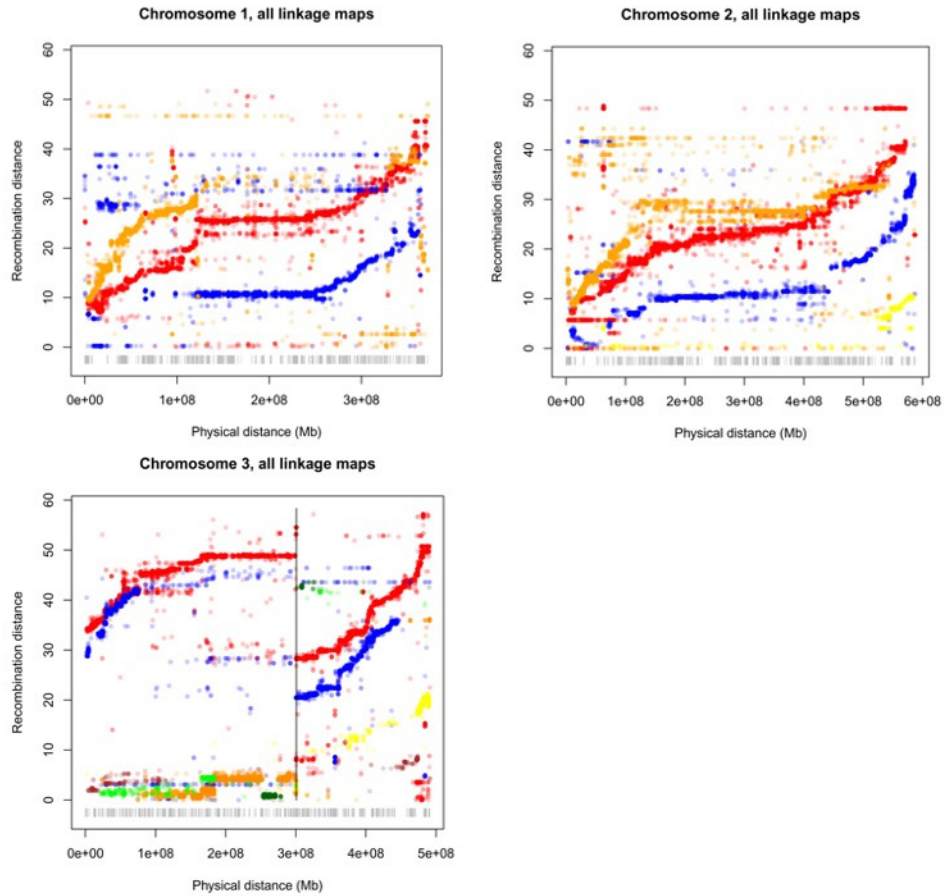

**Figure S2: Linkage maps for the three *Ae. albopictus* chromosomes.** Each point shows the physical (x-axis) and recombination (y-axis) distance of a single SNP marker from one end of the linkage group. The gray ticks at the bottom show the boundaries between scaffolds. Red points show the linkage map based on those markers for which both  $F_0$  parents were homozygous for different alleles. Blue and orange points show the linkage maps based on those markers for which  $F_0$  parents had AB female x AA male and AA female x AB male genotypes, respectively. For Chromosome 2, the AA x AB linkage map was split into two (orange and yellow points). For Chromosome 3, the AA x AB linkage map was split into six sub-maps (the various non-red and non-blue colors). The vertical bar on the Chromosome 3 linkage map shows where we split and inverted the anterior arm of the chromosome based on the results of the synteny comparison with *Ae. aegypti*.

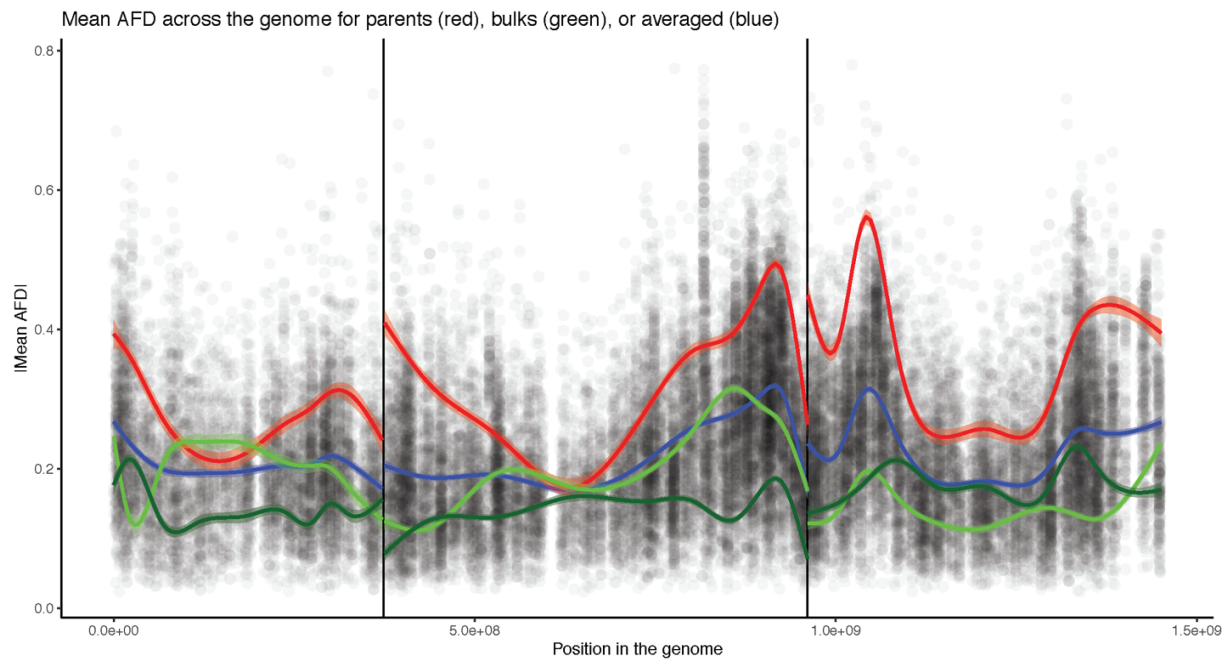

**Figure S3: Regions of elevated allele frequency difference are driven by the comparison between natural populations.** Axes, gray dots and blue lines as in Figure 4 from the main text. Red line shows the trend for the TEMP vs. TROP [AFD], green lines show the trend for the two bulks.

**Table S3. Coordinates on the AalbF3 assembly of candidate diapause SNPs at false discovery thresholds (FDR-level) of 0.05, 1 and 5 as described in text.**

| FDR-level | Scaffold | Position |
|-----------|----------|----------|
| 0.05      | chr3.19  | 2261869  |
| 0.05      | chr3.1   | 3462509  |
| 0.05      | chr1.5   | 425695   |
| 0.05      | chr2.151 | 9557328  |
| 1         | chr2.186 | 15550749 |
| 1         | chr2.190 | 1106906  |
| 1         | chr2.186 | 29098689 |
| 1         | chr3.45  | 11850311 |
| 1         | chr3.166 | 1169642  |
| 1         | chr3.19  | 2261869  |
| 1         | chr1.152 | 5097418  |
| 1         | chr1.152 | 5097415  |
| 1         | chr1.163 | 581239   |
| 1         | chr2.196 | 4832063  |

|   |          |          |
|---|----------|----------|
| 1 | chr2.163 | 2465993  |
| 1 | chr1.34  | 761479   |
| 1 | chr2.186 | 32813627 |
| 1 | chr2.181 | 6783     |
| 1 | chr2.19  | 9760777  |
| 1 | chr2.157 | 918799   |
| 1 | chr2.19  | 10459354 |
| 1 | chr2.186 | 17679841 |
| 1 | chr2.186 | 17679839 |
| 1 | chr2.186 | 31379554 |
| 1 | chr2.186 | 4486692  |
| 1 | chr2.186 | 3412873  |
| 1 | chr2.186 | 29098752 |
| 1 | chr2.182 | 7297510  |
| 1 | chr3.7   | 538792   |
| 1 | chr3.7   | 538783   |
| 1 | chr2.181 | 6803     |
| 1 | chr2.163 | 2469013  |
| 1 | chr2.163 | 2469010  |
| 1 | chr2.163 | 2468886  |
| 1 | chr2.163 | 2467766  |
| 1 | chr2.163 | 2467742  |
| 1 | chr2.163 | 2467727  |
| 1 | chr2.163 | 2467721  |
| 1 | chr2.163 | 2467637  |
| 1 | chr2.163 | 2467613  |
| 1 | chr2.163 | 2467601  |
| 1 | chr2.163 | 2467588  |
| 1 | chr2.163 | 2467586  |
| 1 | chr2.163 | 2467568  |
| 1 | chr2.163 | 2467562  |
| 1 | chr2.163 | 2467535  |
| 1 | chr2.163 | 2466653  |
| 1 | chr2.163 | 2466593  |
| 1 | chr2.163 | 2466418  |
| 1 | chr3.136 | 1364946  |
| 1 | chr3.166 | 3322334  |
| 1 | chr3.27  | 10601009 |
| 1 | chr3.24  | 350946   |

|   |          |          |
|---|----------|----------|
| 1 | chr3.24  | 350853   |
| 1 | chr1.10  | 1304806  |
| 1 | chr3.1   | 3462509  |
| 1 | chr3.136 | 1764215  |
| 1 | chr3.20  | 7759813  |
| 1 | chr1.37  | 409384   |
| 1 | chr1.152 | 5883846  |
| 1 | chr2.190 | 1106737  |
| 1 | chr2.205 | 4214520  |
| 1 | chr2.186 | 25933766 |
| 1 | chr2.182 | 2721664  |
| 1 | chr2.196 | 1706310  |
| 1 | chr1.5   | 425695   |
| 1 | chr2.186 | 25425063 |
| 1 | chr2.196 | 437179   |
| 1 | chr2.123 | 2652146  |
| 1 | chr3.27  | 2456597  |
| 1 | chr3.25  | 80308    |
| 1 | chr2.163 | 4202864  |
| 1 | chr2.163 | 2706299  |
| 1 | chr3.147 | 105793   |
| 1 | chr1.37  | 409338   |
| 1 | chr2.151 | 9557328  |
| 1 | chr2.163 | 5560527  |
| 1 | chr3.1   | 1143798  |
| 1 | chr3.40  | 7840460  |
| 1 | chr3.27  | 10600965 |
| 1 | chr1.100 | 64767    |
| 5 | chr2.196 | 3223463  |
| 5 | chr2.196 | 3223454  |
| 5 | chr2.193 | 272110   |
| 5 | chr2.186 | 15550749 |
| 5 | chr2.186 | 1019659  |
| 5 | chr2.186 | 27209638 |
| 5 | chr2.186 | 27209611 |
| 5 | chr2.179 | 3259424  |
| 5 | chr2.179 | 3259013  |
| 5 | chr2.155 | 968930   |
| 5 | chr2.155 | 968888   |

|   |          |          |
|---|----------|----------|
| 5 | chr2.140 | 5745049  |
| 5 | chr3.178 | 2762556  |
| 5 | chr3.178 | 2763121  |
| 5 | chr3.178 | 2763160  |
| 5 | chr3.9   | 5934379  |
| 5 | chr2.196 | 3537815  |
| 5 | chr2.196 | 15028517 |
| 5 | chr2.190 | 1106906  |
| 5 | chr2.186 | 1019654  |
| 5 | chr2.186 | 29098689 |
| 5 | chr2.186 | 24446432 |
| 5 | chr2.163 | 1729465  |
| 5 | chr2.196 | 3675128  |
| 5 | chr2.186 | 794300   |
| 5 | chr2.186 | 794294   |
| 5 | chr3.45  | 11850311 |
| 5 | chr3.29  | 6391766  |
| 5 | chr2.140 | 5066312  |
| 5 | chr2.196 | 5213745  |
| 5 | chr2.172 | 3659293  |
| 5 | chr2.163 | 5791823  |
| 5 | chr3.139 | 2487053  |
| 5 | chr3.139 | 2487054  |
| 5 | chr3.166 | 1169642  |
| 5 | chr3.197 | 47646    |
| 5 | chr1.7   | 4496272  |
| 5 | chr1.7   | 11342339 |
| 5 | chr2.196 | 2173800  |
| 5 | chr2.196 | 2173778  |
| 5 | chr2.196 | 2173756  |
| 5 | chr2.182 | 3721221  |
| 5 | chr2.182 | 2410438  |
| 5 | chr3.19  | 2261869  |
| 5 | chr1.133 | 1996330  |
| 5 | chr1.152 | 5097418  |
| 5 | chr1.152 | 5097415  |
| 5 | chr1.163 | 581239   |
| 5 | chr1.90  | 16885091 |
| 5 | chr2.196 | 4832063  |

|   |          |          |
|---|----------|----------|
| 5 | chr2.179 | 4209591  |
| 5 | chr3.28  | 1069858  |
| 5 | chr2.196 | 9349925  |
| 5 | chr3.166 | 4187577  |
| 5 | chr2.198 | 2955602  |
| 5 | chr2.186 | 21872396 |
| 5 | chr2.186 | 21872393 |
| 5 | chr2.140 | 5270817  |
| 5 | chr3.77  | 12542171 |
| 5 | chr2.196 | 437294   |
| 5 | chr2.196 | 437284   |
| 5 | chr2.163 | 543064   |
| 5 | chr2.163 | 2465993  |
| 5 | chr2.163 | 2465948  |
| 5 | chr3.139 | 2392329  |
| 5 | chr3.39  | 1285018  |
| 5 | chr1.34  | 761479   |
| 5 | chr1.7   | 8514363  |
| 5 | chr1.7   | 5266097  |
| 5 | chr1.7   | 5266096  |
| 5 | chr1.7   | 5266021  |
| 5 | chr1.133 | 4125024  |
| 5 | chr2.17  | 23676261 |
| 5 | chr2.17  | 23676260 |
| 5 | chr2.186 | 32813627 |
| 5 | chr2.181 | 6783     |
| 5 | chr1.10  | 1304770  |
| 5 | chr2.190 | 1211687  |
| 5 | chr2.190 | 320798   |
| 5 | chr2.19  | 9760777  |
| 5 | chr2.182 | 7077973  |
| 5 | chr2.182 | 7077960  |
| 5 | chr2.157 | 918799   |
| 5 | chr3.127 | 529064   |
| 5 | chr3.136 | 7127207  |
| 5 | chr2.19  | 10459354 |
| 5 | chr2.17  | 23998060 |
| 5 | chr2.17  | 23676579 |
| 5 | chr2.186 | 17679841 |

|   |          |          |
|---|----------|----------|
| 5 | chr2.186 | 17679839 |
| 5 | chr2.186 | 31379569 |
| 5 | chr2.186 | 31379554 |
| 5 | chr2.186 | 4486692  |
| 5 | chr2.186 | 3412873  |
| 5 | chr2.186 | 1067749  |
| 5 | chr2.186 | 29608815 |
| 5 | chr2.186 | 29098752 |
| 5 | chr2.182 | 7144674  |
| 5 | chr2.182 | 7144648  |
| 5 | chr2.182 | 7144645  |
| 5 | chr2.182 | 7144627  |
| 5 | chr2.182 | 7297520  |
| 5 | chr2.182 | 7297510  |
| 5 | chr2.175 | 5401222  |
| 5 | chr2.165 | 909375   |
| 5 | chr2.163 | 2333832  |
| 5 | chr2.155 | 11263706 |
| 5 | chr2.140 | 5270838  |
| 5 | chr3.142 | 1345932  |
| 5 | chr3.142 | 3017006  |
| 5 | chr3.151 | 6543652  |
| 5 | chr3.40  | 400831   |
| 5 | chr3.40  | 400797   |
| 5 | chr3.16  | 15877891 |
| 5 | chr3.7   | 538792   |
| 5 | chr3.7   | 538783   |
| 5 | chr1.10  | 364309   |
| 5 | chr2.196 | 129649   |
| 5 | chr2.186 | 7938565  |
| 5 | chr2.186 | 1322048  |
| 5 | chr2.186 | 24411777 |
| 5 | chr2.181 | 6803     |
| 5 | chr2.177 | 773940   |
| 5 | chr2.177 | 773910   |
| 5 | chr2.163 | 3115287  |
| 5 | chr2.163 | 2469745  |
| 5 | chr2.163 | 2469679  |
| 5 | chr2.163 | 2469094  |

|   |          |         |
|---|----------|---------|
| 5 | chr2.163 | 2469027 |
| 5 | chr2.163 | 2469013 |
| 5 | chr2.163 | 2469010 |
| 5 | chr2.163 | 2468980 |
| 5 | chr2.163 | 2468944 |
| 5 | chr2.163 | 2468941 |
| 5 | chr2.163 | 2468886 |
| 5 | chr2.163 | 2468875 |
| 5 | chr2.163 | 2468860 |
| 5 | chr2.163 | 2468785 |
| 5 | chr2.163 | 2468773 |
| 5 | chr2.163 | 2468027 |
| 5 | chr2.163 | 2468024 |
| 5 | chr2.163 | 2467994 |
| 5 | chr2.163 | 2467949 |
| 5 | chr2.163 | 2467766 |
| 5 | chr2.163 | 2467742 |
| 5 | chr2.163 | 2467727 |
| 5 | chr2.163 | 2467721 |
| 5 | chr2.163 | 2467637 |
| 5 | chr2.163 | 2467613 |
| 5 | chr2.163 | 2467601 |
| 5 | chr2.163 | 2467588 |
| 5 | chr2.163 | 2467586 |
| 5 | chr2.163 | 2467568 |
| 5 | chr2.163 | 2467562 |
| 5 | chr2.163 | 2467535 |
| 5 | chr2.163 | 2466659 |
| 5 | chr2.163 | 2466653 |
| 5 | chr2.163 | 2466593 |
| 5 | chr2.163 | 2466497 |
| 5 | chr2.163 | 2466485 |
| 5 | chr2.163 | 2466460 |
| 5 | chr2.163 | 2466452 |
| 5 | chr2.163 | 2466418 |
| 5 | chr2.163 | 2466413 |
| 5 | chr2.163 | 2466340 |
| 5 | chr2.163 | 2466338 |
| 5 | chr2.163 | 2465642 |

|   |          |          |
|---|----------|----------|
| 5 | chr2.140 | 5066272  |
| 5 | chr3.136 | 1364946  |
| 5 | chr3.145 | 355852   |
| 5 | chr3.145 | 355896   |
| 5 | chr3.166 | 3322334  |
| 5 | chr3.27  | 10898419 |
| 5 | chr3.27  | 10601009 |
| 5 | chr3.27  | 10348713 |
| 5 | chr3.25  | 2426063  |
| 5 | chr3.24  | 350946   |
| 5 | chr3.24  | 350853   |
| 5 | chr1.10  | 364332   |
| 5 | chr1.106 | 3958727  |
| 5 | chr3.20  | 9911836  |
| 5 | chr1.10  | 1304806  |
| 5 | chr2.194 | 122494   |
| 5 | chr2.175 | 8260158  |
| 5 | chr2.170 | 2952640  |
| 5 | chr2.170 | 2952631  |
| 5 | chr2.170 | 2952630  |
| 5 | chr2.140 | 12404709 |
| 5 | chr3.1   | 3462509  |
| 5 | chr3.136 | 1764215  |
| 5 | chr3.20  | 3798173  |
| 5 | chr3.20  | 7759813  |
| 5 | chr1.37  | 409384   |
| 5 | chr1.10  | 1319699  |
| 5 | chr2.186 | 1341880  |
| 5 | chr2.163 | 2874203  |
| 5 | chr3.142 | 1349792  |
| 5 | chr3.142 | 1349795  |
| 5 | chr3.142 | 1349803  |
| 5 | chr3.145 | 115123   |
| 5 | chr3.145 | 117534   |
| 5 | chr3.16  | 15823971 |
| 5 | chr1.152 | 5883846  |
| 5 | chr2.190 | 1106737  |
| 5 | chr2.205 | 8869318  |
| 5 | chr2.205 | 4214520  |

|   |          |          |
|---|----------|----------|
| 5 | chr2.186 | 29848220 |
| 5 | chr2.186 | 25933766 |
| 5 | chr2.182 | 2721664  |
| 5 | chr3.166 | 7908016  |
| 5 | chr3.28  | 1285853  |
| 5 | chr1.7   | 19082195 |
| 5 | chr2.196 | 1706310  |
| 5 | chr3.142 | 4044665  |
| 5 | chr3.169 | 3826     |
| 5 | chr3.16  | 1099913  |
| 5 | chr1.170 | 660409   |
| 5 | chr1.5   | 425695   |
| 5 | chr2.196 | 3899105  |
| 5 | chr2.186 | 27735884 |
| 5 | chr2.163 | 2686028  |
| 5 | chr3.142 | 2512406  |
| 5 | chr3.27  | 2456642  |
| 5 | chr3.142 | 4038468  |
| 5 | chr3.61  | 157367   |
| 5 | chr2.196 | 3231168  |
| 5 | chr2.49  | 432784   |
| 5 | chr2.186 | 29848218 |
| 5 | chr2.186 | 25425063 |
| 5 | chr2.165 | 909384   |
| 5 | chr2.163 | 6566258  |
| 5 | chr2.196 | 437179   |
| 5 | chr2.175 | 3744730  |
| 5 | chr2.123 | 2652146  |
| 5 | chr3.122 | 5058945  |
| 5 | chr3.27  | 2456604  |
| 5 | chr3.27  | 2456597  |
| 5 | chr3.27  | 2324689  |
| 5 | chr3.25  | 80308    |
| 5 | chr2.163 | 4202864  |
| 5 | chr2.163 | 2706299  |
| 5 | chr3.147 | 105793   |
| 5 | chr3.147 | 858369   |
| 5 | chr1.50  | 9046252  |
| 5 | chr1.37  | 409338   |

|   |          |          |
|---|----------|----------|
| 5 | chr1.139 | 6208060  |
| 5 | chr2.71  | 302561   |
| 5 | chr2.151 | 9557328  |
| 5 | chr3.142 | 655274   |
| 5 | chr3.61  | 775955   |
| 5 | chr1.161 | 257707   |
| 5 | chr2.186 | 15861726 |
| 5 | chr2.166 | 55553    |
| 5 | chr2.163 | 5560527  |
| 5 | chr3.1   | 1143798  |
| 5 | chr3.147 | 672511   |
| 5 | chr3.40  | 7840460  |
| 5 | chr3.27  | 10600965 |
| 5 | chr3.27  | 2257250  |
| 5 | chr1.100 | 64767    |

**Table S4. Genes located within 50Kb of candidate diapause SNPs at false discovery thresholds (FDR-level) of 0.05, 1 and 5 as described in text.**

| <b>FDR-level</b> | <b>scaffold</b> | <b>gene_name</b>                                            | <b>gene_id</b> |
|------------------|-----------------|-------------------------------------------------------------|----------------|
| 0.05             | chr1.5          | gametogenetin-binding protein 2-like                        | LOC109402174   |
| 0.05             | chr1.5          | segmentation polarity homeobox protein engrailed-like       | LOC109402178   |
| 0.05             | chr1.5          | casein kinase II subunit alpha                              | LOC109413239   |
| 0.05             | chr3.1          | homeobox protein OTX2-A                                     | LOC109411232   |
| 0.05             | chr3.19         | ice-structuring glycoprotein                                | LOC109398746   |
| 0.05             | chr3.19         | 3-ketodihydrosphingosine reductase                          | LOC109398749   |
| 0.05             | chr3.19         | methyl-CpG-binding domain protein 3%2C                      | LOC109398750   |
| 0.05             | chr3.19         | vacuolar protein sorting-associated protein 45              | LOC109398753   |
| 0.05             | chr3.19         | nuclear pore complex protein Nup58                          | LOC109398754   |
| 0.05             | chr3.19         | metaxin-1 homolog                                           | LOC109398756   |
| 0.05             | chr3.19         | uncharacterized LOC109424986                                | LOC109424986   |
| 1                | chr1.10         | molybdenum cofactor sulfurase 3                             | LOC109415232   |
| 1                | chr1.10         | 26S proteasome regulatory subunit 8                         | LOC109415235   |
| 1                | chr1.10         | pyrimidine-specific ribonucleoside hydrolase RihA-like      | LOC109415237   |
| 1                | chr1.10         | protein artemis-like                                        | LOC109428353   |
| 1                | chr1.10         | mannosyl-oligosaccharide alpha-1%2C2-mannosidase IA-like%2C | LOC109428360   |
| 1                | chr1.10         | migration and invasion enhancer 1-like                      | LOC115256449   |
| 1                | chr1.10         | activating signal cointegrator 1-like                       | LOC115256586   |

|   |          |                                                                            |              |
|---|----------|----------------------------------------------------------------------------|--------------|
| 1 | chr1.152 | uncharacterized LOC109403881                                               | LOC109403881 |
| 1 | chr1.152 | uncharacterized LOC109403974                                               | LOC109403974 |
| 1 | chr1.152 | condensin complex subunit 1-like%2C                                        | LOC109404013 |
| 1 | chr1.152 | pinin-like%2C                                                              | LOC109413333 |
| 1 | chr1.152 | uncharacterized LOC109413349                                               | LOC109413349 |
| 1 | chr1.152 | sorting nexin-12-like                                                      | LOC109432030 |
| 1 | chr1.152 | uncharacterized LOC109432033                                               | LOC109432033 |
| 1 | chr1.152 | band 4.1-like protein 4B%2C                                                | LOC109432042 |
| 1 | chr1.152 | actin-87E                                                                  | LOC109432056 |
| 1 | chr1.152 | actin-87E-like                                                             | LOC109432057 |
| 1 | chr1.152 | actin-like                                                                 | LOC109432070 |
| 1 | chr1.152 | uncharacterized LOC115254117                                               | LOC115254117 |
| 1 | chr1.163 | protein scarlet-like                                                       | LOC109422176 |
| 1 | chr1.163 | uncharacterized LOC115260019                                               | LOC115260019 |
| 1 | chr1.34  | uncharacterized LOC109401916%2C                                            | LOC109401916 |
| 1 | chr1.34  | protein kibra                                                              | LOC109414692 |
| 1 | chr1.37  | brefeldin A-inhibited guanine nucleotide-exchange protein 3-like           | LOC109432078 |
| 1 | chr1.37  | fatty acid hydroxylase domain-containing protein 2-like;start_range=.,9498 | LOC115258418 |
| 1 | chr1.37  | malignant T-cell-amplified sequence 1 homolog                              | LOC115269045 |
| 1 | chr1.5   | gametogenetin-binding protein 2-like                                       | LOC109402174 |
| 1 | chr1.5   | segmentation polarity homeobox protein engrailed-like                      | LOC109402178 |
| 1 | chr1.5   | casein kinase II subunit alpha                                             | LOC109413239 |
| 1 | chr2.123 | facilitated trehalose transporter Tret1-like                               | LOC109404663 |
| 1 | chr2.123 | facilitated trehalose transporter Tret1-like                               | LOC109433068 |
| 1 | chr2.123 | facilitated trehalose transporter Tret1                                    | LOC109433069 |
| 1 | chr2.157 | proteasome subunit alpha type-1-like                                       | LOC109429097 |
| 1 | chr2.157 | mediator of RNA polymerase II transcription subunit 16-like                | LOC115258794 |
| 1 | chr2.163 | translation factor GUF1 homolog%2C mitochondrial                           | LOC109414223 |
| 1 | chr2.163 | collagen alpha-1(IV) chain%2C                                              | LOC109417703 |
| 1 | chr2.163 | SPRY domain-containing SOCS box protein 3%2C                               | LOC109417706 |
| 1 | chr2.163 | protein MEMO1-like                                                         | LOC109417716 |
| 1 | chr2.163 | leucine-rich repeat and calponin homology domain-containing protein 1%2C   | LOC109417717 |
| 1 | chr2.163 | protein MON2 homolog                                                       | LOC109417726 |
| 1 | chr2.163 | vascular endothelial growth factor receptor kdr-like%2C                    | LOC109417728 |
| 1 | chr2.163 | probable palmitoyltransferase ZDHHC24                                      | LOC115253935 |
| 1 | chr2.163 | suppressor APC domain-containing protein 2-like                            | LOC115255361 |
| 1 | chr2.163 | uncharacterized LOC115255496                                               | LOC115255496 |

|   |          |                                                                |              |
|---|----------|----------------------------------------------------------------|--------------|
| 1 | chr2.163 | COPII coat assembly protein sec16-like                         | LOC115255497 |
| 1 | chr2.163 | collagen alpha-1(IV) chain-like                                | LOC115255505 |
| 1 | chr2.163 | collagen alpha-5(IV) chain-like                                | LOC115255506 |
| 1 | chr2.181 | repressor of RNA polymerase III transcription MAF1 homolog     | LOC115264869 |
| 1 | chr2.182 | phosphatidylinositol 4-phosphate 5-kinase type-1 alpha-like%2C | LOC109416244 |
| 1 | chr2.182 | protein daughterless                                           | LOC109416248 |
| 1 | chr2.182 | protein phosphatase 1 regulatory subunit 42-like               | LOC109416265 |
| 1 | chr2.182 | annulin                                                        | LOC109430162 |
| 1 | chr2.182 | lipase member H                                                | LOC109430164 |
| 1 | chr2.186 | elongation factor G%2C mitochondrial                           | LOC109404794 |
| 1 | chr2.186 | pre-mRNA-splicing factor ATP-dependent RNA helicase DHX16-like | LOC109404796 |
| 1 | chr2.186 | potassium voltage-gated channel protein Shaw%2C                | LOC109409153 |
| 1 | chr2.186 | uncharacterized LOC109410844                                   | LOC109410844 |
| 1 | chr2.186 | cardioactive peptide%2C                                        | LOC109419320 |
| 1 | chr2.186 | protein bowel                                                  | LOC109421565 |
| 1 | chr2.186 | sodium-driven chloride bicarbonate exchanger-like%2C           | LOC109423877 |
| 1 | chr2.186 | probable cysteine desulfurase%2C mitochondrial                 | LOC109423882 |
| 1 | chr2.186 | chymotrypsin-like protease CTRL-1                              | LOC109621365 |
| 1 | chr2.186 | cGMP-dependent protein kinase%2C isozyme 1-like                | LOC109621380 |
| 1 | chr2.186 | neither inactivation nor afterpotential protein C-like         | LOC109621667 |
| 1 | chr2.186 | matrix metalloproteinase-15-like                               | LOC109622311 |
| 1 | chr2.186 | lysosomal alpha-mannosidase%2C                                 | LOC109622322 |
| 1 | chr2.186 | chymotrypsinogen B-like                                        | LOC109622327 |
| 1 | chr2.186 | uncharacterized LOC115268609                                   | LOC115268609 |
| 1 | chr2.186 | suppressor protein SRP40-like%2C                               | LOC115268611 |
| 1 | chr2.186 | transcription initiation factor TFIID subunit 10-like          | LOC115268623 |
| 1 | chr2.190 | lysosomal alpha-mannosidase-like                               | LOC109621385 |
| 1 | chr2.190 | cGMP-dependent protein kinase%2C isozyme 1-like                | LOC115268590 |
| 1 | chr2.190 | lysosomal alpha-mannosidase-like                               | LOC115268591 |
| 1 | chr2.196 | dual specificity protein phosphatase 3%2C                      | LOC109402145 |
| 1 | chr2.196 | uncharacterized LOC109402207                                   | LOC109402207 |
| 1 | chr2.196 | transcription factor hamlet-like                               | LOC109402239 |
| 1 | chr2.196 | polypeptide N-acetylgalactosaminyltransferase 3                | LOC109402524 |
| 1 | chr2.196 | ficolin-2-like                                                 | LOC109415861 |
| 1 | chr2.196 | trithorax group protein osa-like%2C                            | LOC115253453 |
| 1 | chr2.205 | tubulin-specific chaperone C-like%2C                           | LOC109404612 |
| 1 | chr2.205 | ATP synthase subunit g%2C mitochondrial-like                   | LOC109404613 |
| 1 | chr2.205 | protein brunelleschi                                           | LOC109411678 |
| 1 | chr2.205 | V-type proton ATPase subunit H%2C                              | LOC109411679 |

|   |          |                                                     |              |
|---|----------|-----------------------------------------------------|--------------|
| 1 | chr2.205 | cytidine deaminase-like                             | LOC109411684 |
| 1 | chr2.205 | uncharacterized LOC115261992                        | LOC115261992 |
| 1 | chr2.205 | protein HIRA homolog%2C                             | LOC115262165 |
| 1 | chr3.1   | homeobox protein OTX2-A                             | LOC109411232 |
| 1 | chr3.136 | pancreatic triacylglycerol lipase-like              | LOC109426884 |
| 1 | chr3.136 | phospholipase A1 VesT1.02%2C                        | LOC109426885 |
| 1 | chr3.136 | phospholipase A1 member A-like                      | LOC109426908 |
| 1 | chr3.136 | pancreatic triacylglycerol lipase                   | LOC109426909 |
| 1 | chr3.136 | pancreatic triacylglycerol lipase-like              | LOC109426910 |
| 1 | chr3.136 | pancreatic lipase-related protein 2-like            | LOC109426911 |
| 1 | chr3.136 | uncharacterized LOC109623319%2C                     | LOC109623319 |
| 1 | chr3.136 | protein enabled%2C                                  | LOC109623320 |
| 1 | chr3.136 | uncharacterized LOC109623327%2C                     | LOC109623327 |
| 1 | chr3.147 | sterol O-acyltransferase 1%2C                       | LOC109414895 |
| 1 | chr3.147 | cell wall protein RBR3-like                         | LOC109414898 |
| 1 | chr3.147 | facilitated trehalose transporter Tret1             | LOC109428885 |
| 1 | chr3.166 | uncharacterized LOC109398036                        | LOC109398036 |
| 1 | chr3.166 | neuropeptide Y receptor type 5                      | LOC109399551 |
| 1 | chr3.166 | sphingomyelin phosphodiesterase                     | LOC109399584 |
| 1 | chr3.166 | uncharacterized LOC115253622                        | LOC115253622 |
| 1 | chr3.19  | ice-structuring glycoprotein                        | LOC109398746 |
| 1 | chr3.19  | 3-ketodihydrosphingosine reductase                  | LOC109398749 |
| 1 | chr3.19  | methyl-CpG-binding domain protein 3%2C              | LOC109398750 |
| 1 | chr3.19  | vacuolar protein sorting-associated protein 45      | LOC109398753 |
| 1 | chr3.19  | nuclear pore complex protein Nup58                  | LOC109398754 |
| 1 | chr3.19  | metaxin-1 homolog                                   | LOC109398756 |
| 1 | chr3.19  | uncharacterized LOC109424986                        | LOC109424986 |
| 1 | chr3.24  | uncharacterized LOC115270914                        | LOC115270914 |
| 1 | chr3.25  | odorant receptor 94a-like;start_range=.,4911766     | LOC109401998 |
| 1 | chr3.25  | ninjurin-1-like%2C                                  | LOC109402043 |
| 1 | chr3.25  | axin-like%2C                                        | LOC109413707 |
| 1 | chr3.27  | RNA-binding protein Musashi homolog 2-like%2C       | LOC109400186 |
| 1 | chr3.27  | glycine receptor subunit alpha-2-like               | LOC115266218 |
| 1 | chr3.40  | GTPase-activating Rap/Ran-GAP domain-like protein 3 | LOC109433290 |
| 1 | chr3.40  | leucine-rich repeat-containing protein 20-like%2C   | LOC109433312 |
| 1 | chr3.45  | uncharacterized LOC109433277                        | LOC109433277 |
| 1 | chr3.45  | lazarillo protein-like                              | LOC109621419 |
| 1 | chr3.45  | outer membrane lipoprotein Blc-like                 | LOC109622081 |
| 1 | chr3.45  | apolipoprotein D-like                               | LOC109622083 |

|   |          |                                                             |              |
|---|----------|-------------------------------------------------------------|--------------|
| 1 | chr3.7   | uncharacterized LOC109421710                                | LOC109421710 |
| 1 | chr3.7   | uncharacterized LOC109428975                                | LOC109428975 |
| 1 | chr3.7   | uncharacterized LOC115268728                                | LOC115268728 |
| 1 | chr3.7   | uncharacterized LOC115268742                                | LOC115268742 |
| 5 | chr1.10  | molybdenum cofactor sulfurase 3                             | LOC109415232 |
| 5 | chr1.10  | 26S proteasome regulatory subunit 8                         | LOC109415235 |
| 5 | chr1.10  | pyrimidine-specific ribonucleoside hydrolase RihA-like      | LOC109415237 |
| 5 | chr1.10  | protein artemis-like                                        | LOC109428353 |
| 5 | chr1.10  | mannosyl-oligosaccharide alpha-1%2C2-mannosidase IA-like%2C | LOC109428360 |
| 5 | chr1.10  | migration and invasion enhancer 1-like                      | LOC115256449 |
| 5 | chr1.10  | activating signal cointegrator 1-like                       | LOC115256586 |
| 5 | chr1.10  | molybdenum cofactor sulfurase 2                             | LOC115256654 |
| 5 | chr1.106 | autophagy-related protein 2 homolog A-like%2C               | LOC109429975 |
| 5 | chr1.106 | uncharacterized LOC109430003                                | LOC109430003 |
| 5 | chr1.106 | uncharacterized LOC109430695                                | LOC109430695 |
| 5 | chr1.106 | non-specific lipid-transfer protein-like 1                  | LOC109430696 |
| 5 | chr1.106 | non-specific lipid-transfer protein-like 1                  | LOC109430699 |
| 5 | chr1.106 | uncharacterized LOC109430729                                | LOC109430729 |
| 5 | chr1.133 | RPII140-upstream gene protein-like                          | LOC109396977 |
| 5 | chr1.133 | endoplasmin-like                                            | LOC109396991 |
| 5 | chr1.133 | bifunctional purine biosynthesis protein PURH               | LOC109412575 |
| 5 | chr1.133 | RPII140-upstream gene protein                               | LOC109412577 |
| 5 | chr1.133 | serine-rich adhesin for platelets-like%2C                   | LOC109433664 |
| 5 | chr1.133 | serine-rich adhesin for platelets-like                      | LOC115259491 |
| 5 | chr1.133 | endoplasmin-like                                            | LOC115259492 |
| 5 | chr1.133 | uncharacterized LOC115259749                                | LOC115259749 |
| 5 | chr1.139 | polyserase-2-like                                           | LOC109623081 |
| 5 | chr1.152 | uncharacterized LOC109403881                                | LOC109403881 |
| 5 | chr1.152 | uncharacterized LOC109403974                                | LOC109403974 |
| 5 | chr1.152 | condensin complex subunit 1-like%2C                         | LOC109404013 |
| 5 | chr1.152 | pinin-like%2C                                               | LOC109413333 |
| 5 | chr1.152 | uncharacterized LOC109413349                                | LOC109413349 |
| 5 | chr1.152 | sorting nexin-12-like                                       | LOC109432030 |
| 5 | chr1.152 | uncharacterized LOC109432033                                | LOC109432033 |
| 5 | chr1.152 | band 4.1-like protein 4B%2C                                 | LOC109432042 |
| 5 | chr1.152 | actin-87E                                                   | LOC109432056 |
| 5 | chr1.152 | actin-87E-like                                              | LOC109432057 |
| 5 | chr1.152 | actin-like                                                  | LOC109432070 |
| 5 | chr1.152 | uncharacterized LOC115254117                                | LOC115254117 |

|   |          |                                                                            |              |
|---|----------|----------------------------------------------------------------------------|--------------|
| 5 | chr1.161 | protein D2                                                                 | LOC109429318 |
| 5 | chr1.163 | protein scarlet-like                                                       | LOC109422176 |
| 5 | chr1.163 | uncharacterized LOC115260019                                               | LOC115260019 |
| 5 | chr1.170 | protein lethal(2) giant larvae%2C                                          | LOC109405206 |
| 5 | chr1.170 | fatty-acid amide hydrolase 2-like                                          | LOC109405223 |
| 5 | chr1.170 | AN1-type zinc finger protein 2A                                            | LOC109405229 |
| 5 | chr1.170 | uncharacterized LOC109405236                                               | LOC109405236 |
| 5 | chr1.170 | uncharacterized LOC109412868                                               | LOC109412868 |
| 5 | chr1.170 | exocyst complex component 2                                                | LOC109412869 |
| 5 | chr1.34  | uncharacterized LOC109401916%2C                                            | LOC109401916 |
| 5 | chr1.34  | protein kibra                                                              | LOC109414692 |
| 5 | chr1.37  | brefeldin A-inhibited guanine nucleotide-exchange protein 3-like           | LOC109432078 |
| 5 | chr1.37  | fatty acid hydroxylase domain-containing protein 2-like;start_range=.,9498 | LOC115258418 |
| 5 | chr1.37  | malignant T-cell-amplified sequence 1 homolog                              | LOC115269045 |
| 5 | chr1.5   | gametogenetin-binding protein 2-like                                       | LOC109402174 |
| 5 | chr1.5   | segmentation polarity homeobox protein engrailed-like                      | LOC109402178 |
| 5 | chr1.5   | casein kinase II subunit alpha                                             | LOC109413239 |
| 5 | chr1.50  | vesicle-associated membrane protein/synaptobrevin-binding protein          | LOC109405079 |
| 5 | chr1.50  | vacuolar protein sorting-associated protein 4B-like%2C                     | LOC109416543 |
| 5 | chr1.50  | protein Mo25%2C                                                            | LOC109416544 |
| 5 | chr1.50  | vacuolar protein sorting-associated protein 4B-like                        | LOC109416561 |
| 5 | chr1.7   | uncharacterized LOC109397866                                               | LOC109397866 |
| 5 | chr1.7   | disks large 1 tumor suppressor protein-like%2C                             | LOC109413204 |
| 5 | chr1.7   | probable cytosolic oligopeptidase A                                        | LOC109413211 |
| 5 | chr1.7   | dynein assembly factor 4%2C axonemal-like                                  | LOC109413212 |
| 5 | chr1.7   | solute carrier family 25 member 35-like%2C                                 | LOC109413251 |
| 5 | chr1.7   | probable phosphorylase b kinase regulatory subunit alpha%2C                | LOC109415631 |
| 5 | chr1.7   | phosphatidylinositol phosphatase SAC1                                      | LOC109415652 |
| 5 | chr1.7   | cyclic AMP response element-binding protein B%2C                           | LOC109415675 |
| 5 | chr1.7   | potassium voltage-gated channel protein Shaker%2C                          | LOC109424932 |
| 5 | chr1.7   | protein unc-13 homolog B-like%2C                                           | LOC109424983 |
| 5 | chr1.7   | uncharacterized LOC109431117                                               | LOC109431117 |
| 5 | chr1.7   | T-complex protein 1 subunit beta-like                                      | LOC115256345 |
| 5 | chr1.7   | p21-activated protein kinase-interacting protein 1-like                    | LOC115256346 |
| 5 | chr1.7   | uncharacterized LOC115256417                                               | LOC115256417 |
| 5 | chr1.7   | paired box protein Pax-6%2C                                                | LOC115256418 |
| 5 | chr1.7   | nose resistant to fluoxetine protein 6-like                                | LOC115256571 |

|   |          |                                                                      |              |
|---|----------|----------------------------------------------------------------------|--------------|
| 5 | chr1.7   | uncharacterized LOC115256573                                         | LOC115256573 |
| 5 | chr1.7   | uncharacterized LOC115256793                                         | LOC115256793 |
| 5 | chr1.90  | protein sidekick-2-like                                              | LOC109432221 |
| 5 | chr2.123 | facilitated trehalose transporter Tret1-like                         | LOC109404663 |
| 5 | chr2.123 | facilitated trehalose transporter Tret1-like                         | LOC109433068 |
| 5 | chr2.123 | facilitated trehalose transporter Tret1                              | LOC109433069 |
| 5 | chr2.140 | proton-associated sugar transporter A                                | LOC109402171 |
| 5 | chr2.140 | structural maintenance of chromosomes protein 4                      | LOC109408120 |
| 5 | chr2.140 | plasminogen receptor (KT)                                            | LOC109408121 |
| 5 | chr2.140 | enolase%2C                                                           | LOC109408124 |
| 5 | chr2.140 | uncharacterized LOC109408126%2C                                      | LOC109408126 |
| 5 | chr2.140 | mite group 2 allergen Gly d 2.02-like                                | LOC109408133 |
| 5 | chr2.140 | uncharacterized LOC109408136%2C                                      | LOC109408136 |
| 5 | chr2.140 | phenoloxidase-activating factor 3-like                               | LOC109409285 |
| 5 | chr2.140 | uncharacterized LOC109419020                                         | LOC109419020 |
| 5 | chr2.140 | cell division control protein 1-like                                 | LOC109419028 |
| 5 | chr2.140 | phenoloxidase-activating factor 3-like                               | LOC109419553 |
| 5 | chr2.140 | phenoloxidase-activating factor 3                                    | LOC109419569 |
| 5 | chr2.140 | uncharacterized LOC109430388                                         | LOC109430388 |
| 5 | chr2.140 | putative histone deacetylase complex subunit cti6                    | LOC115266898 |
| 5 | chr2.140 | uncharacterized LOC115266955                                         | LOC115266955 |
| 5 | chr2.155 | methylocrotonoyl-CoA carboxylase subunit alpha%2C mitochondrial-like | LOC109405612 |
| 5 | chr2.155 | zinc finger protein 271-like                                         | LOC109405613 |
| 5 | chr2.155 | MAGUK p55 subfamily member 7%2C                                      | LOC109405615 |
| 5 | chr2.155 | beta-ureidopropionase                                                | LOC109416534 |
| 5 | chr2.155 | rab3 GTPase-activating protein catalytic subunit-like                | LOC109416535 |
| 5 | chr2.157 | proteasome subunit alpha type-1-like                                 | LOC109429097 |
| 5 | chr2.157 | mediator of RNA polymerase II transcription subunit 16-like          | LOC115258794 |
| 5 | chr2.163 | translation factor GUF1 homolog%2C mitochondrial                     | LOC109414223 |
| 5 | chr2.163 | uncharacterized LOC109417557                                         | LOC109417557 |
| 5 | chr2.163 | glutathione S-transferase 1-like%2C                                  | LOC109417558 |
| 5 | chr2.163 | glutathione S-transferase 1-like                                     | LOC109417559 |
| 5 | chr2.163 | glutathione S-transferase 1-like                                     | LOC109417694 |
| 5 | chr2.163 | glutathione S-transferase 1-like                                     | LOC109417695 |
| 5 | chr2.163 | glutathione S-transferase 1-like                                     | LOC109417699 |
| 5 | chr2.163 | collagen alpha-1(IV) chain%2C                                        | LOC109417703 |
| 5 | chr2.163 | SPRY domain-containing SOCS box protein 3%2C                         | LOC109417706 |
| 5 | chr2.163 | mitogen-activated protein kinase 1-like                              | LOC109417712 |

|   |          |                                                                          |              |
|---|----------|--------------------------------------------------------------------------|--------------|
| 5 | chr2.163 | protein MEMO1-like                                                       | LOC109417716 |
| 5 | chr2.163 | leucine-rich repeat and calponin homology domain-containing protein 1%2C | LOC109417717 |
| 5 | chr2.163 | protein MON2 homolog                                                     | LOC109417726 |
| 5 | chr2.163 | vascular endothelial growth factor receptor kdr-like%2C                  | LOC109417728 |
| 5 | chr2.163 | uncharacterized LOC109417730                                             | LOC109417730 |
| 5 | chr2.163 | CCHC-type zinc finger protein CG3800%2C                                  | LOC109417743 |
| 5 | chr2.163 | SPRY domain-containing SOCS box protein 3-like                           | LOC109418099 |
| 5 | chr2.163 | collagen alpha-5(IV) chain-like                                          | LOC109418207 |
| 5 | chr2.163 | proline-rich extensin-like protein EPR1%2C                               | LOC109419826 |
| 5 | chr2.163 | receptor-type tyrosine-protein phosphatase kappa%2C                      | LOC109420026 |
| 5 | chr2.163 | E3 ubiquitin-protein ligase TRIM37-like                                  | LOC109420030 |
| 5 | chr2.163 | outer dense fiber protein 3-like                                         | LOC109425500 |
| 5 | chr2.163 | uncharacterized LOC109428206                                             | LOC109428206 |
| 5 | chr2.163 | probable palmitoyltransferase ZDHHC24                                    | LOC115253935 |
| 5 | chr2.163 | cell wall protein DAN4-like%2C                                           | LOC115253947 |
| 5 | chr2.163 | neuralized-like protein 2                                                | LOC115253948 |
| 5 | chr2.163 | suppressor APC domain-containing protein 2-like                          | LOC115255361 |
| 5 | chr2.163 | glutathione S-transferase 1-like                                         | LOC115255365 |
| 5 | chr2.163 | glutathione S-transferase 1-like                                         | LOC115255368 |
| 5 | chr2.163 | glutathione S-transferase E14-like                                       | LOC115255371 |
| 5 | chr2.163 | inhibitor of Bruton tyrosine kinase-like                                 | LOC115255378 |
| 5 | chr2.163 | uncharacterized LOC115255379                                             | LOC115255379 |
| 5 | chr2.163 | GATOR complex protein WDR59-like%2C                                      | LOC115255381 |
| 5 | chr2.163 | uncharacterized LOC115255382                                             | LOC115255382 |
| 5 | chr2.163 | carcinine transporter-like                                               | LOC115255394 |
| 5 | chr2.163 | probable nuclear hormone receptor HR38                                   | LOC115255395 |
| 5 | chr2.163 | uncharacterized LOC115255496                                             | LOC115255496 |
| 5 | chr2.163 | COPII coat assembly protein sec16-like                                   | LOC115255497 |
| 5 | chr2.163 | collagen alpha-1(IV) chain-like                                          | LOC115255505 |
| 5 | chr2.163 | collagen alpha-5(IV) chain-like                                          | LOC115255506 |
| 5 | chr2.165 | bromodomain adjacent to zinc finger domain protein 1A-like               | LOC109416656 |
| 5 | chr2.165 | probable serine/threonine-protein kinase tsuA                            | LOC115255296 |
| 5 | chr2.17  | protein MTO1 homolog%2C mitochondrial                                    | LOC109423260 |
| 5 | chr2.17  | synaptic vesicle 2-related protein                                       | LOC109423347 |
| 5 | chr2.17  | retinol dehydrogenase 12-like%2C                                         | LOC109423348 |
| 5 | chr2.17  | uncharacterized LOC109423355%2C                                          | LOC109423355 |
| 5 | chr2.17  | potassium voltage-gated channel subfamily H member 6%2C                  | LOC109423356 |
| 5 | chr2.170 | nephrin-like                                                             | LOC109399785 |

|   |          |                                                                        |              |
|---|----------|------------------------------------------------------------------------|--------------|
| 5 | chr2.172 | ubiquitin carboxyl-terminal hydrolase 7%2C                             | LOC109420687 |
| 5 | chr2.175 | trissin receptor%2C                                                    | LOC109419738 |
| 5 | chr2.175 | uncharacterized LOC109419739%2C                                        | LOC109419739 |
| 5 | chr2.175 | dedicator of cytokinesis protein 9-like%2C                             | LOC109419769 |
| 5 | chr2.175 | UBX domain-containing protein 7-like%2C                                | LOC109420048 |
| 5 | chr2.175 | cyclin-dependent kinase 5 activator 1-like                             | LOC109420208 |
| 5 | chr2.175 | uncharacterized LOC115253936                                           | LOC115253936 |
| 5 | chr2.177 | uncharacterized LOC115262467%2C                                        | LOC115262467 |
| 5 | chr2.177 | group XV phospholipase A2-like%2C                                      | LOC115262468 |
| 5 | chr2.177 | ras-related and estrogen-regulated growth inhibitor-like protein       | LOC115262469 |
| 5 | chr2.179 | coiled-coil domain-containing protein 40                               | LOC109430129 |
| 5 | chr2.179 | zinc finger protein 561                                                | LOC109430130 |
| 5 | chr2.179 | alpha-amylase 3-like                                                   | LOC109430131 |
| 5 | chr2.179 | monocarboxylate transporter 7-like                                     | LOC109430179 |
| 5 | chr2.179 | calmodulin-lysine N-methyltransferase-like%2C                          | LOC109430182 |
| 5 | chr2.179 | protein expanded                                                       | LOC109433586 |
| 5 | chr2.179 | mitochondrial basic amino acids transporter%2C                         | LOC109433587 |
| 5 | chr2.181 | repressor of RNA polymerase III transcription MAF1 homolog             | LOC115264869 |
| 5 | chr2.182 | anoctamin-10%2C                                                        | LOC109405621 |
| 5 | chr2.182 | phosphatidylinositol 4-phosphate 5-kinase type-1 alpha-like%2C         | LOC109416244 |
| 5 | chr2.182 | protein daughterless                                                   | LOC109416248 |
| 5 | chr2.182 | protein phosphatase 1 regulatory subunit 42-like                       | LOC109416265 |
| 5 | chr2.182 | protein quiver%2C                                                      | LOC109427566 |
| 5 | chr2.182 | uncharacterized LOC109430153                                           | LOC109430153 |
| 5 | chr2.182 | serine/threonine-protein phosphatase PP2A 65 kDa regulatory subunit%2C | LOC109430154 |
| 5 | chr2.182 | annulin                                                                | LOC109430162 |
| 5 | chr2.182 | lipase member H                                                        | LOC109430164 |
| 5 | chr2.182 | cyclin-H                                                               | LOC109432628 |
| 5 | chr2.182 | uncharacterized LOC109432638%2C                                        | LOC109432638 |
| 5 | chr2.182 | lipase member H-A-like%2C                                              | LOC115253443 |
| 5 | chr2.186 | elongation factor G%2C mitochondrial                                   | LOC109404794 |
| 5 | chr2.186 | pre-mRNA-splicing factor ATP-dependent RNA helicase DHX16-like         | LOC109404796 |
| 5 | chr2.186 | potassium voltage-gated channel protein Shaw%2C                        | LOC109409153 |
| 5 | chr2.186 | 1%2C5-anhydro-D-fructose reductase-like                                | LOC109409173 |
| 5 | chr2.186 | uncharacterized LOC109410844                                           | LOC109410844 |
| 5 | chr2.186 | uncharacterized LOC109418112                                           | LOC109418112 |
| 5 | chr2.186 | transmembrane protein 189%2C                                           | LOC109418121 |
| 5 | chr2.186 | uncharacterized LOC109418136                                           | LOC109418136 |

|   |          |                                                                           |              |
|---|----------|---------------------------------------------------------------------------|--------------|
| 5 | chr2.186 | tripartite motif-containing protein 45                                    | LOC109418152 |
| 5 | chr2.186 | odorant receptor 30a-like                                                 | LOC109418186 |
| 5 | chr2.186 | uncharacterized LOC109418214                                              | LOC109418214 |
| 5 | chr2.186 | cardioactive peptide%2C                                                   | LOC109419320 |
| 5 | chr2.186 | WW domain-binding protein 11-like                                         | LOC109421430 |
| 5 | chr2.186 | protein bowel                                                             | LOC109421565 |
| 5 | chr2.186 | sodium-driven chloride bicarbonate exchanger-like%2C                      | LOC109423877 |
| 5 | chr2.186 | probable cysteine desulfurase%2C mitochondrial                            | LOC109423882 |
| 5 | chr2.186 | adenylate kinase isoenzyme 1-like;start_range=.,157154773                 | LOC109423938 |
| 5 | chr2.186 | uncharacterized LOC109430993                                              | LOC109430993 |
| 5 | chr2.186 | peptidyl-tRNA hydrolase ICT1%2C mitochondrial-like                        | LOC109430997 |
| 5 | chr2.186 | chymotrypsin-like protease CTRL-1                                         | LOC109621365 |
| 5 | chr2.186 | cGMP-dependent protein kinase%2C isozyme 1-like                           | LOC109621380 |
| 5 | chr2.186 | neither inactivation nor afterpotential protein C-like                    | LOC109621667 |
| 5 | chr2.186 | matrix metalloproteinase-15-like                                          | LOC109622311 |
| 5 | chr2.186 | lysosomal alpha-mannosidase%2C                                            | LOC109622322 |
| 5 | chr2.186 | chymotrypsinogen B-like                                                   | LOC109622327 |
| 5 | chr2.186 | tetratricopeptide repeat protein 19 homolog%2C mitochondrial-like         | LOC115265561 |
| 5 | chr2.186 | uncharacterized LOC115265562                                              | LOC115265562 |
| 5 | chr2.186 | protein abrupt-like                                                       | LOC115265563 |
| 5 | chr2.186 | tctex1 domain-containing protein 2-like                                   | LOC115265630 |
| 5 | chr2.186 | alpha-tocopherol transfer protein-like%2C                                 | LOC115265631 |
| 5 | chr2.186 | alpha-tocopherol transfer protein-like                                    | LOC115265632 |
| 5 | chr2.186 | uncharacterized LOC115265633                                              | LOC115265633 |
| 5 | chr2.186 | eukaryotic peptide chain release factor GTP-binding subunit ERF3A-like%2C | LOC115265634 |
| 5 | chr2.186 | ribosome biogenesis protein TSR3 homolog                                  | LOC115265635 |
| 5 | chr2.186 | uncharacterized protein C1orf194-like                                     | LOC115265636 |
| 5 | chr2.186 | serine/arginine-rich splicing factor 2-like%2C                            | LOC115265637 |
| 5 | chr2.186 | probable tRNA (guanine(26)-N(2))-dimethyltransferase                      | LOC115265638 |
| 5 | chr2.186 | probable 4-coumarate--CoA ligase 3                                        | LOC115266859 |
| 5 | chr2.186 | uncharacterized LOC115266866                                              | LOC115266866 |
| 5 | chr2.186 | uncharacterized LOC115268609                                              | LOC115268609 |
| 5 | chr2.186 | suppressor protein SRP40-like%2C                                          | LOC115268611 |
| 5 | chr2.186 | transcription initiation factor TFIID subunit 10-like                     | LOC115268623 |
| 5 | chr2.190 | coagulation factor IX-like                                                | LOC109621360 |
| 5 | chr2.190 | elastase-1-like                                                           | LOC109621364 |
| 5 | chr2.190 | lysosomal alpha-mannosidase-like                                          | LOC109621385 |

|   |          |                                                         |              |
|---|----------|---------------------------------------------------------|--------------|
| 5 | chr2.190 | chymotrypsin-C-like                                     | LOC109622333 |
| 5 | chr2.190 | cGMP-dependent protein kinase%2C isozyme 1-like         | LOC115268590 |
| 5 | chr2.190 | lysosomal alpha-mannosidase-like                        | LOC115268591 |
| 5 | chr2.190 | leucine-rich repeat-containing protein 15-like          | LOC115268596 |
| 5 | chr2.190 | rhodanese domain-containing protein CG4456-like         | LOC115268597 |
| 5 | chr2.190 | rhodanese domain-containing protein CG4456-like         | LOC115268598 |
| 5 | chr2.193 | multidrug resistance-associated protein 1-like          | LOC109407008 |
| 5 | chr2.193 | uncharacterized LOC115262072                            | LOC115262072 |
| 5 | chr2.193 | multidrug resistance-associated protein 1-like          | LOC115262073 |
| 5 | chr2.193 | multidrug resistance-associated protein 1-like          | LOC115262076 |
| 5 | chr2.194 | uncharacterized LOC109429599                            | LOC109429599 |
| 5 | chr2.196 | dual specificity protein phosphatase 3%2C               | LOC109402145 |
| 5 | chr2.196 | uncharacterized LOC109402207                            | LOC109402207 |
| 5 | chr2.196 | transcription factor hamlet-like                        | LOC109402239 |
| 5 | chr2.196 | NTF2-related export protein                             | LOC109402269 |
| 5 | chr2.196 | ATP-dependent DNA/RNA helicase DHX36                    | LOC109402297 |
| 5 | chr2.196 | protein Shroom                                          | LOC109402335 |
| 5 | chr2.196 | gamma-butyrobetaine dioxygenase                         | LOC109402345 |
| 5 | chr2.196 | spermatogenesis-associated protein 20%2C                | LOC109402466 |
| 5 | chr2.196 | 3-phosphoinositide-dependent protein kinase 1-like      | LOC109402475 |
| 5 | chr2.196 | piezo-type mechanosensitive ion channel component       | LOC109402487 |
| 5 | chr2.196 | protein YIPF6-like                                      | LOC109402498 |
| 5 | chr2.196 | probable phosphorylase b kinase regulatory subunit beta | LOC109402506 |
| 5 | chr2.196 | polypeptide N-acetylgalactosaminyltransferase 3         | LOC109402524 |
| 5 | chr2.196 | uncharacterized protein At4g17910-like                  | LOC109402525 |
| 5 | chr2.196 | uncharacterized LOC109402726%2C                         | LOC109402726 |
| 5 | chr2.196 | multidrug resistance-associated protein 1-like          | LOC109407010 |
| 5 | chr2.196 | transient receptor potential-gamma protein-like         | LOC109407024 |
| 5 | chr2.196 | TGF-beta receptor type-1%2C                             | LOC109415848 |
| 5 | chr2.196 | THO complex subunit 2                                   | LOC109415853 |
| 5 | chr2.196 | G-protein coupled receptor 143-like                     | LOC109415854 |
| 5 | chr2.196 | gastrulation defective protein 1 homolog                | LOC109415856 |
| 5 | chr2.196 | uncharacterized LOC109415860                            | LOC109415860 |
| 5 | chr2.196 | ficolin-2-like                                          | LOC109415861 |
| 5 | chr2.196 | nitric oxide synthase-like                              | LOC109416795 |
| 5 | chr2.196 | serine-rich adhesin for platelets                       | LOC109416797 |
| 5 | chr2.196 | AP-1 complex subunit gamma-1%2C                         | LOC109416800 |
| 5 | chr2.196 | uncharacterized LOC109429555                            | LOC109429555 |
| 5 | chr2.196 | ATP-binding cassette sub-family G member 4-like         | LOC109429556 |

|   |          |                                                                  |              |
|---|----------|------------------------------------------------------------------|--------------|
| 5 | chr2.196 | 1-acyl-sn-glycerol-3-phosphate acyltransferase alpha%2C          | LOC109429613 |
| 5 | chr2.196 | 1-acyl-sn-glycerol-3-phosphate acyltransferase alpha-like        | LOC109429615 |
| 5 | chr2.196 | multidrug resistance-associated protein 1-like                   | LOC109429691 |
| 5 | chr2.196 | trithorax group protein osa-like%2C                              | LOC115253453 |
| 5 | chr2.196 | multidrug resistance-associated protein 1-like                   | LOC115262119 |
| 5 | chr2.196 | leucine-rich repeat extensin-like protein 5                      | LOC115262242 |
| 5 | chr2.198 | UDP-glucuronosyltransferase 1-3-like%2C                          | LOC109429550 |
| 5 | chr2.198 | uncharacterized LOC109429914                                     | LOC109429914 |
| 5 | chr2.205 | tubulin-specific chaperone C-like%2C                             | LOC109404612 |
| 5 | chr2.205 | ATP synthase subunit g%2C mitochondrial-like                     | LOC109404613 |
| 5 | chr2.205 | protein brunelleschi                                             | LOC109411678 |
| 5 | chr2.205 | V-type proton ATPase subunit H%2C                                | LOC109411679 |
| 5 | chr2.205 | cytidine deaminase-like                                          | LOC109411684 |
| 5 | chr2.205 | nesprin-1%2C                                                     | LOC109411751 |
| 5 | chr2.205 | sulfotransferase family cytosolic 1B member 1-like%2C            | LOC109411753 |
| 5 | chr2.205 | dynein-1-beta heavy chain%2C flagellar inner arm I1 complex-like | LOC109420441 |
| 5 | chr2.205 | dynein heavy chain 2%2C axonemal                                 | LOC109420451 |
| 5 | chr2.205 | uncharacterized LOC115261992                                     | LOC115261992 |
| 5 | chr2.205 | protein HIRA homolog%2C                                          | LOC115262165 |
| 5 | chr2.49  | uncharacterized LOC109428726                                     | LOC109428726 |
| 5 | chr2.49  | putative ankyrin repeat protein RF_0381                          | LOC115270181 |
| 5 | chr2.71  | T-box transcription factor TBX6-like                             | LOC115263148 |
| 5 | chr3.1   | homeobox protein OTX2-A                                          | LOC109411232 |
| 5 | chr3.122 | kinesin-like protein costa                                       | LOC109401279 |
| 5 | chr3.122 | Down syndrome cell adhesion molecule-like protein Dscam2%2C      | LOC115262726 |
| 5 | chr3.127 | nose resistant to fluoxetine protein 6-like                      | LOC109415352 |
| 5 | chr3.127 | uncharacterized LOC115268029                                     | LOC115268029 |
| 5 | chr3.136 | pancreatic triacylglycerol lipase-like                           | LOC109426884 |
| 5 | chr3.136 | phospholipase A1 VesT1.02%2C                                     | LOC109426885 |
| 5 | chr3.136 | phospholipase A1 member A-like                                   | LOC109426908 |
| 5 | chr3.136 | pancreatic triacylglycerol lipase                                | LOC109426909 |
| 5 | chr3.136 | pancreatic triacylglycerol lipase-like                           | LOC109426910 |
| 5 | chr3.136 | pancreatic lipase-related protein 2-like                         | LOC109426911 |
| 5 | chr3.136 | uncharacterized LOC109623319%2C                                  | LOC109623319 |
| 5 | chr3.136 | protein enabled%2C                                               | LOC109623320 |
| 5 | chr3.136 | uncharacterized LOC109623327%2C                                  | LOC109623327 |
| 5 | chr3.136 | protein bunched%2C class 2/F/G isoform-like                      | LOC115262674 |
| 5 | chr3.139 | zinc finger protein 628-like%2C                                  | LOC109424670 |
| 5 | chr3.139 | peptide chain release factor 1-like%2C mitochondrial             | LOC109424685 |

|   |          |                                                                |              |
|---|----------|----------------------------------------------------------------|--------------|
| 5 | chr3.139 | zinc finger protein 2-like%2C                                  | LOC109424686 |
| 5 | chr3.139 | exosome complex component RRP41                                | LOC109424687 |
| 5 | chr3.139 | zinc finger protein 569-like                                   | LOC109424688 |
| 5 | chr3.139 | zinc finger protein OZF-like%2C                                | LOC109424689 |
| 5 | chr3.139 | zinc finger protein 33A-like                                   | LOC109424707 |
| 5 | chr3.139 | zinc finger protein 25-like                                    | LOC109424708 |
| 5 | chr3.139 | sphingolipid delta(4)-desaturase DES1%2C                       | LOC109424709 |
| 5 | chr3.139 | ubiquitin carboxyl-terminal hydrolase                          | LOC109424711 |
| 5 | chr3.142 | RNA polymerase II elongation factor ELL2-like%2C               | LOC109408615 |
| 5 | chr3.142 | coatomer subunit beta'-like%2C                                 | LOC109408617 |
| 5 | chr3.142 | huntingtin-interacting protein 1-like%2C                       | LOC109408623 |
| 5 | chr3.142 | condensin-2 complex subunit D3                                 | LOC109412035 |
| 5 | chr3.142 | zinc finger protein 2-like                                     | LOC109412039 |
| 5 | chr3.142 | caspase Dronc                                                  | LOC109412040 |
| 5 | chr3.142 | F-box/WD repeat-containing protein 4                           | LOC109412041 |
| 5 | chr3.142 | vacuolar protein-sorting-associated protein 36%2C              | LOC109412042 |
| 5 | chr3.142 | protein Exd1 homolog                                           | LOC109412044 |
| 5 | chr3.142 | proteasomal ubiquitin receptor ADRM1 homolog%2C                | LOC109412046 |
| 5 | chr3.142 | DNA-directed RNA polymerases I%2C II%2C and III subunit RPABC4 | LOC109412048 |
| 5 | chr3.142 | ubiquitin-protein ligase E3C                                   | LOC109412049 |
| 5 | chr3.142 | vanin-like protein 1                                           | LOC109421936 |
| 5 | chr3.142 | vanin-like protein 1                                           | LOC109421937 |
| 5 | chr3.142 | vanin-like protein 2%2C                                        | LOC109421938 |
| 5 | chr3.142 | hsp70-Hsp90 organizing protein-like                            | LOC109421952 |
| 5 | chr3.142 | girdin-like                                                    | LOC109424641 |
| 5 | chr3.142 | uncharacterized LOC115262635                                   | LOC115262635 |
| 5 | chr3.142 | uncharacterized LOC115262783                                   | LOC115262783 |
| 5 | chr3.145 | transcription factor mef2A-like                                | LOC115267702 |
| 5 | chr3.147 | sterol O-acyltransferase 1%2C                                  | LOC109414895 |
| 5 | chr3.147 | cell wall protein RBR3-like                                    | LOC109414898 |
| 5 | chr3.147 | RNA-binding protein fusilli%2C                                 | LOC109416894 |
| 5 | chr3.147 | liver carboxylesterase 4%2C                                    | LOC109416898 |
| 5 | chr3.147 | solute carrier family 26 member 6-like%2C                      | LOC109416899 |
| 5 | chr3.147 | facilitated trehalose transporter Tret1                        | LOC109428885 |
| 5 | chr3.151 | fatty acyl-CoA reductase wat-like                              | LOC109397024 |
| 5 | chr3.151 | protein O-mannosyltransferase 1                                | LOC109397145 |
| 5 | chr3.151 | fatty acyl-CoA reductase wat-like                              | LOC109432268 |
| 5 | chr3.151 | OTU domain-containing protein 3-like                           | LOC115268116 |
| 5 | chr3.16  | odorant receptor 85c-like                                      | LOC109405837 |

|   |          |                                                                  |              |
|---|----------|------------------------------------------------------------------|--------------|
| 5 | chr3.16  | low-density lipoprotein receptor-like%2C                         | LOC109405842 |
| 5 | chr3.16  | ribosomal protein S6 kinase delta-1                              | LOC109405847 |
| 5 | chr3.16  | 40S ribosomal protein S3                                         | LOC109405848 |
| 5 | chr3.16  | developmentally-regulated GTP-binding protein 2                  | LOC109405853 |
| 5 | chr3.16  | uncharacterized LOC109405854                                     | LOC109405854 |
| 5 | chr3.16  | glycine receptor subunit alpha-3%2C                              | LOC109405857 |
| 5 | chr3.16  | uncharacterized LOC109410413                                     | LOC109410413 |
| 5 | chr3.16  | dual specificity protein kinase Ttk                              | LOC109415993 |
| 5 | chr3.16  | uncharacterized LOC109419222                                     | LOC109419222 |
| 5 | chr3.16  | actin-histidine N-methyltransferase                              | LOC109419225 |
| 5 | chr3.166 | uncharacterized LOC109398036                                     | LOC109398036 |
| 5 | chr3.166 | neuropeptide Y receptor type 5                                   | LOC109399551 |
| 5 | chr3.166 | sphingomyelin phosphodiesterase                                  | LOC109399584 |
| 5 | chr3.166 | 1-acylglycerol-3-phosphate O-acyltransferase Pnpla3-like%2C      | LOC109399662 |
| 5 | chr3.166 | T-related protein-like                                           | LOC109399677 |
| 5 | chr3.166 | MOXD1 homolog 2-like                                             | LOC109414400 |
| 5 | chr3.166 | uncharacterized LOC115253622                                     | LOC115253622 |
| 5 | chr3.169 | alpha/beta hydrolase domain-containing protein 17B-like          | LOC109408972 |
| 5 | chr3.169 | senecionine N-oxygenase-like                                     | LOC109408978 |
| 5 | chr3.169 | flavin-containing monooxygenase FMO GS-OX-like 6                 | LOC109426475 |
| 5 | chr3.169 | uncharacterized LOC115253676                                     | LOC115253676 |
| 5 | chr3.178 | major facilitator superfamily domain-containing protein 8-like   | LOC109621446 |
| 5 | chr3.178 | solute carrier family 22 member 4-like                           | LOC109621447 |
| 5 | chr3.178 | major facilitator superfamily domain-containing protein 8-like   | LOC109621449 |
| 5 | chr3.178 | feline leukemia virus subgroup C receptor-related protein 2-like | LOC109621463 |
| 5 | chr3.178 | major facilitator superfamily domain-containing protein 8-like   | LOC115268003 |
| 5 | chr3.178 | major facilitator superfamily domain-containing protein 8-like   | LOC115268200 |
| 5 | chr3.19  | ice-structuring glycoprotein                                     | LOC109398746 |
| 5 | chr3.19  | 3-ketodihydrosphingosine reductase                               | LOC109398749 |
| 5 | chr3.19  | methyl-CpG-binding domain protein 3%2C                           | LOC109398750 |
| 5 | chr3.19  | vacuolar protein sorting-associated protein 45                   | LOC109398753 |
| 5 | chr3.19  | nuclear pore complex protein Nup58                               | LOC109398754 |
| 5 | chr3.19  | metaxin-1 homolog                                                | LOC109398756 |
| 5 | chr3.19  | uncharacterized LOC109424986                                     | LOC109424986 |
| 5 | chr3.197 | Golgi apparatus protein 1-like%2C                                | LOC109423975 |
| 5 | chr3.197 | acetyl-CoA acetyltransferase%2C cytosolic-like%2C                | LOC109426727 |
| 5 | chr3.197 | uncharacterized LOC115266166                                     | LOC115266166 |
| 5 | chr3.20  | ras-related protein Rab-4B-like                                  | LOC109413689 |
| 5 | chr3.20  | exocyst complex component 8                                      | LOC109413690 |

|   |         |                                                                        |              |
|---|---------|------------------------------------------------------------------------|--------------|
| 5 | chr3.20 | ABC transporter F family member 4                                      | LOC109413691 |
| 5 | chr3.20 | N-sulphoglucosamine sulphohydrolase                                    | LOC109413692 |
| 5 | chr3.20 | Krueppel-like factor 3                                                 | LOC109413778 |
| 5 | chr3.20 | A disintegrin and metalloproteinase with thrombospondin motifs 9%2C    | LOC109622416 |
| 5 | chr3.20 | myogenesis-regulating glycosidase-like%2C                              | LOC115254153 |
| 5 | chr3.20 | A disintegrin and metalloproteinase with thrombospondin motifs 12-like | LOC115265500 |
| 5 | chr3.20 | proline-rich protein 4-like                                            | LOC115265501 |
| 5 | chr3.24 | uncharacterized LOC115270914                                           | LOC115270914 |
| 5 | chr3.25 | odorant receptor 94a-like;start_range=.,4911766                        | LOC109401998 |
| 5 | chr3.25 | ninjurin-1-like%2C                                                     | LOC109402043 |
| 5 | chr3.25 | axin-like%2C                                                           | LOC109413707 |
| 5 | chr3.25 | glycylpeptide N-tetradecanoyltransferase-like                          | LOC109413885 |
| 5 | chr3.25 | uncharacterized LOC109413887                                           | LOC109413887 |
| 5 | chr3.27 | nuclear protein localization protein 4 homolog%2C                      | LOC109400185 |
| 5 | chr3.27 | RNA-binding protein Musashi homolog 2-like%2C                          | LOC109400186 |
| 5 | chr3.27 | cytochrome P450 4c21-like                                              | LOC109426977 |
| 5 | chr3.27 | probable cytochrome P450 313a4                                         | LOC115266198 |
| 5 | chr3.27 | glycine receptor subunit alpha-2-like                                  | LOC115266218 |
| 5 | chr3.28 | uncharacterized LOC109397518                                           | LOC109397518 |
| 5 | chr3.28 | uncharacterized LOC109411644                                           | LOC109411644 |
| 5 | chr3.28 | stabilizer of axonemal microtubules 1                                  | LOC109411655 |
| 5 | chr3.28 | eukaryotic translation initiation factor 1A%2C X-chromosomal           | LOC109411708 |
| 5 | chr3.28 | hexosaminidase D                                                       | LOC109621941 |
| 5 | chr3.29 | dual specificity protein phosphatase MPK-4-like%2C                     | LOC109410792 |
| 5 | chr3.29 | calcyclin-binding protein                                              | LOC109410892 |
| 5 | chr3.29 | mitotic spindle assembly checkpoint protein MAD2B                      | LOC109410893 |
| 5 | chr3.29 | uncharacterized LOC115267549%2C                                        | LOC115267549 |
| 5 | chr3.39 | DNA-dependent protein kinase catalytic subunit-like                    | LOC109414486 |
| 5 | chr3.39 | UMP-CMP kinase                                                         | LOC109414508 |
| 5 | chr3.39 | transmembrane protein 141                                              | LOC109414524 |
| 5 | chr3.39 | conserved oligomeric Golgi complex subunit 3-like                      | LOC109414535 |
| 5 | chr3.39 | putative GTP-binding protein 6                                         | LOC109423413 |
| 5 | chr3.39 | latrophilin Cirl%2C                                                    | LOC109423417 |
| 5 | chr3.40 | protein polybromo-1-like%2C                                            | LOC109423385 |
| 5 | chr3.40 | D-amino-acid oxidase                                                   | LOC109423386 |
| 5 | chr3.40 | D-amino-acid oxidase-like                                              | LOC109423387 |
| 5 | chr3.40 | GTPase-activating Rap/Ran-GAP domain-like protein 3                    | LOC109433290 |

|   |         |                                                   |              |
|---|---------|---------------------------------------------------|--------------|
| 5 | chr3.40 | leucine-rich repeat-containing protein 20-like%2C | LOC109433312 |
| 5 | chr3.45 | uncharacterized LOC109433277                      | LOC109433277 |
| 5 | chr3.45 | lazarillo protein-like                            | LOC109621419 |
| 5 | chr3.45 | outer membrane lipoprotein Blc-like               | LOC109622081 |
| 5 | chr3.45 | apolipoprotein D-like                             | LOC109622083 |
| 5 | chr3.61 | uncharacterized LOC109403296%2C                   | LOC109403296 |
| 5 | chr3.61 | uncharacterized LOC109409395                      | LOC109409395 |
| 5 | chr3.61 | U4/U6 small nuclear ribonucleoprotein Prp31       | LOC109431235 |
| 5 | chr3.61 | phosphatidylserine synthase 1%2C                  | LOC109431247 |
| 5 | chr3.61 | reactive oxygen species modulator 1-like          | LOC115264609 |
| 5 | chr3.7  | uncharacterized LOC109421710                      | LOC109421710 |
| 5 | chr3.7  | uncharacterized LOC109428975                      | LOC109428975 |
| 5 | chr3.7  | uncharacterized LOC115268728                      | LOC115268728 |
| 5 | chr3.7  | uncharacterized LOC115268742                      | LOC115268742 |
| 5 | chr3.77 | toll-like receptor Tollo                          | LOC115257389 |
| 5 | chr3.9  | protein maelstrom homolog                         | LOC109418366 |
| 5 | chr3.9  | protein maelstrom homolog                         | LOC109418415 |
| 5 | chr3.9  | uncharacterized LOC109426145                      | LOC109426145 |

## References

47. National Center for Biotechnology Information (NCBI). The UniVec Database. 2017. Available online: <https://www.ncbi.nlm.nih.gov/tools/vecscreen/univec/> (accessed on 1 March 2019).
48. Bolger, A.M.; Lohse, M.; Usadel, B. A flexible trimmer for Illumina sequence data. *Bioinformatics* **2014**, *30*, 2114–2120.
49. Cox, M.P.; Peterson, D.A.; Biggs, P.J. SolexaQA: At-a-glance quality assessment of Illumina second-generation sequencing data. *BMC Bioinform.* **2010**, *11*, 485.
50. Dobin, A.; Davis, C.A.; Schlesinger, F.; Drenkow, J.; Zaleski, C.; Jha, S.; Batut, P.; Chaisson, M.; Gingeras, T.R. STAR: Ultrafast universal RNA-seq aligner. *Bioinformatics* **2013**, *29*, 15–21.
51. Broad Institute. Picard. Version 2.20.4. 2019. Available online: <https://broadinstitute.github.io/picard> (accessed 10 March 2020).
52. Li, H. A statistical framework for SNP calling, mutation discovery, association mapping and population genetical parameter estimation from sequencing data. *Bioinformatics* **2011**, *27*, 2987–2993.
53. McKenna, A.; Hanna, M.; Banks, E.; Sivachenko, A.; Cibulskis, K.; Kernytsky, A.; Garimella, K.; Altshuler, D.; Gabriel, S.; Daly, M.; et al. The Genome Analysis Toolkit: A MapReduce framework for analyzing next-generation DNA sequencing data. *Genome Res.* **2010**, *20*, 1297–1303.
54. Batz, Z.A.; Clemento, A.J.; Fritzenwanker, J.; Ring, T.J.; Garza, J.C.; Armbruster, P.A. Rapid adaptive evolution of the diapause program during range expansion of an invasive mosquito. *Evolution* **2020**, *74*, 1451–1465.
55. Trpiš, M. A new bleaching and decalcifying method for general use in zoology. *Can. J. Zool.* **1970**, *48*, 892–893.
